# Supplementary material for: Small RNA and degradome profiling reveals miRNA regulation in the seed germination of ancient eudicot Nelumbo nucifera
Source: PubMed Central journal article supplement (PMC5002175; doi:10.1186/s12864-016-3032-4), 2016-08-26
Supplement: 12864_2016_3032_MOESM1_ESM.pdf [file 12864_2016_3032_MOESM1_ESM.pdf]

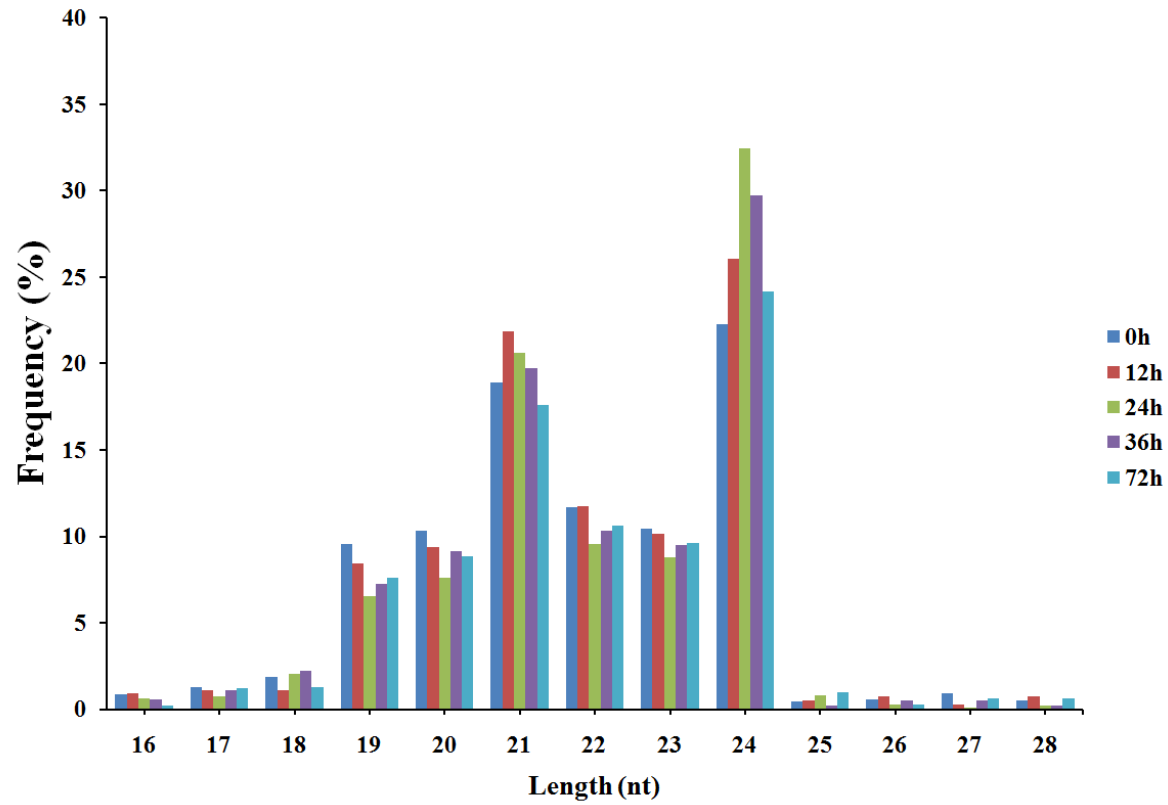

**Additional file 1: Figure S1 Size distribution of small RNAs in all five libraries from germinating seed at 0h, 12h, 24h, 36h and 72h.**

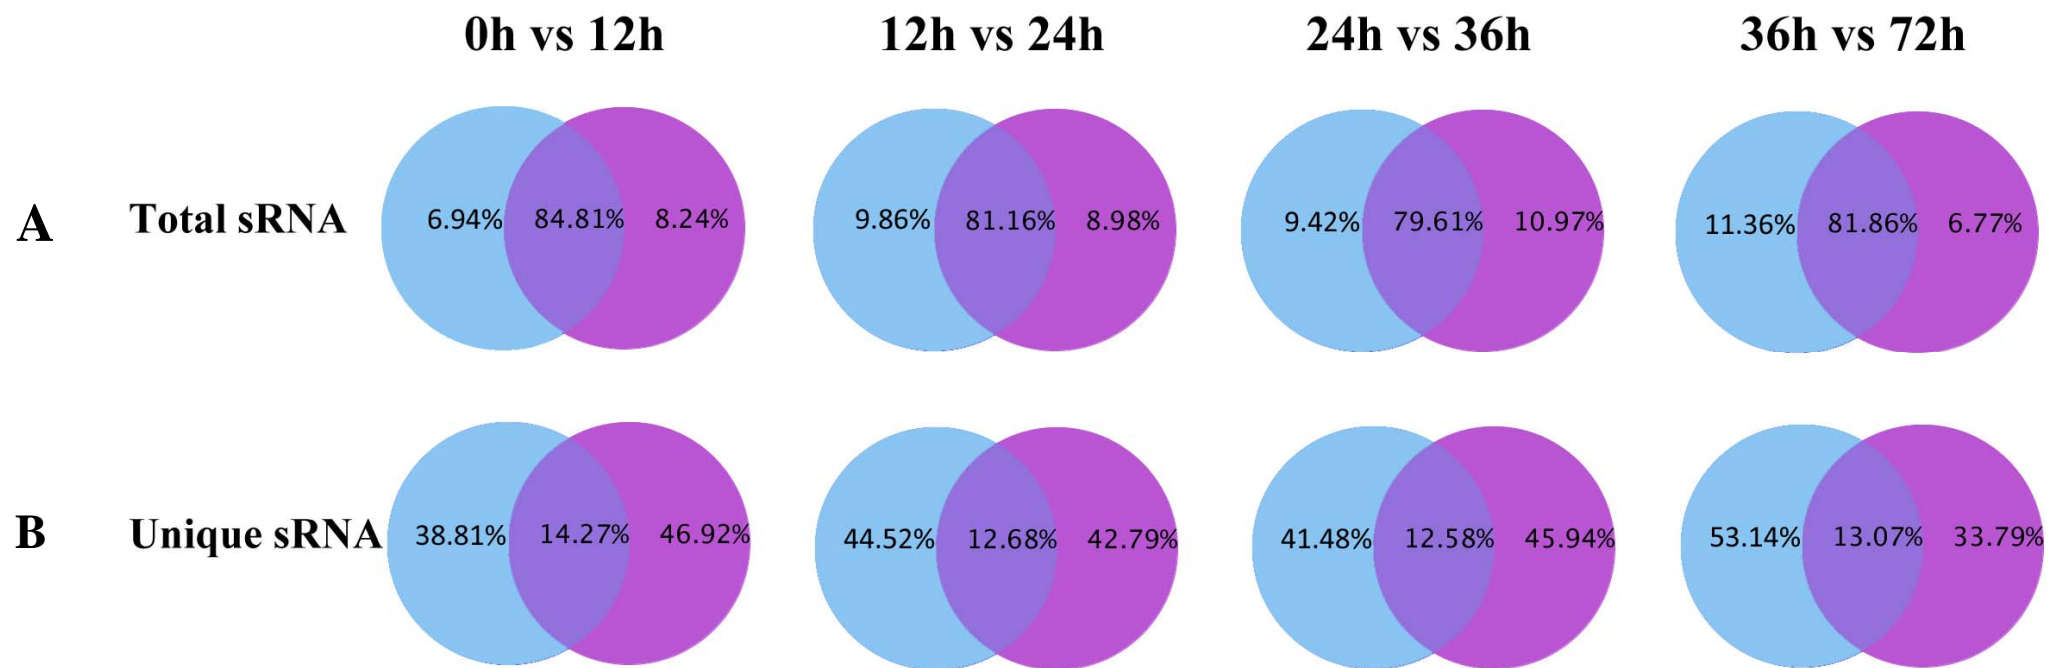

**Additional file 1: Figure S2 Venn chart for total sRNA (A) and unique sRNAs (B) among adjoining stages.**

**Additional file 1: Figure S3 The secondary structures of sacred lotus novel miRNA precursors. The mature miRNAs are in red and miRNA\* in blue. ( "." represent baase mismatches, "(" represent base matches).**

**novel\_mir\_1**

```
TCGATGATGGTCTTACGGGTGTCTTCACCTCCGGAGTTGAAGAACATTATCGGAGATTCGTCGTATTTCCATCGGAGGTGAAGGCCACCCGCTAGATCTTCATCGAT
(((((((.((((.(.((((((((((((((((((((((.(.((...))).....((((((.....)))))).)))))))).))))).))))).))))).))))).
*****TCTTACGGGTGTCTTCACCTC*****
```

**novel\_mir\_10**

```
ATCGGGAGGCTGCGGAATGGACGGGTCGGAAACAAAATTCTCGTCTGTGGGATTGTTTTTTGTTTGCTTCCAACCCCGCCATTCCATAGTTTTTCCGA
.(((((((.((((.(.((((((((((((((((((((((.(.((...))).....((((((.....)))))).)))))))).))))).))))).))))).))))).
*****GGAATGGACGGGTCGGAAACA*****
*****CTTCCAACCCCGCCATTCCAT*****
```

**novel\_mir\_102**

```
ATAAAGGTAATGATCGGGGATGCACTTTCCTGATGGAAACCAAACCTACCGGCATTTGATCTCAATCATTGGAATTTTTTTTTGTAAAATCTATATATATGATAT
ATACTTACATATGGTTTCAAACATTTGCAAATGGGCTAAGAGGTTAAGTGTAAGGCCATTTAGTCAGGCAGTGCTTGATCATTATCCTAAA
.....(((((((.((((.(.((((((((((((((((((((((.(.((...))).....((((((.....)))))).)))))))).))))).))))).))))).))))).
*****TGATCGGGGATGCACTTTCCTG*****
*****
```

**novel\_mir\_103**

```
CATTCCTCGAGGCAAGCCCGATCAAAGTCTATGTTAGGGTCTGAAATTTCTTATTTCTCACATAAAAAATAATAATTTTTTATCAAAAAATAAAAAATAATGA
TTTTATACTTTCATTGCCTTTAAGAAGATATTTTATTGCAATGAATGAATGAACAACATTAGCAAATAAGGGGTTCTCACATAAAAGGCAATGAAAGTTATAA
AATCATTATTTTTTATGTGAGACATAAGAATTTAGACCCTAACATAGACTTGTGGGTTTGCCTCGAGGAGAGT
.((((.(((((((((((((((((((((((((((((((.(.((...))).....((((((.....)))))).)))))))).))))).))))).))))).))))).
*****
```































**novel\_mir\_66**

GTGGTCCCTTTATACCTGACTCCCGTCGTTGATAATTTCTGAGGTGTAATTTGTTGGCGTTAAATGAAATCTAGTCTTTTGGCTTCCAAATAAAAGAAATTACAAA  
AAAAAAAACACTCATGAAGGATGTATCATTAATTAGTAGTTAAGTATCATTAAACTCATAATTTTAGCATCTGGTGGACGTGCCGGAGTGGTTATCGGGCATG  
...(((((((((.....)))))))).)).....)))))...  
.....)))))(((((.....)))))).....)))))...)))))...  
\*\*\*\*\*  
\*\*\*\*\*GTGGACGTGCCGGAGTGGTT\*\*\*\*\*

**novel\_mir\_68**

AGTGGTTGAGGTGTCGTCCAGCTTGAGCTTGATTCAAATTAGAGACGCGAGGTGTTGAGCTAAGGCCTCCCTTAGTTGACAAGGTGCTGAGTTGAGGTCTCCCTCAGTTG  
TCGAGGTGCTGAGCCGAGACCTCCCTTAGTGACCGAGGTGTCAAGCCGATGTCTCCCTCAGTGGTTGAAGTGTCTGCTAGCTCAAGCTCGATTCTGAATTAA  
.....(((((((.....)))))))).(((((.....)))))).....  
.....))))).....  
\*\*\*\*\*  
\*\*\*\*\*TGTCGTCTAGCTCAAGCTCGA\*\*\*\*\*

**novel\_mir\_69**

CCATTCGAAGAAAATTTAGTTTCAGATCAGAGATTGGCAATGGAAAGTTTCTTCAATGTGGTTATGTTAAGCTTCTCTTTTGTGTTAGATGTTCTTATTGTTTTC  
CTCTGTGGTGATGAAATATGAAAATTCCTTCGCATG  
.(((((((.....)))))))).  
)))).)))))  
\*\*\*\*\*  
\*\*\*TGTGGTGATGAAATATGAAAAT\*\*\*\*\*

**novel\_mir\_7**

AGAACGTCCCCCTTCGAGTTCGCCAGTCAACGCAGATATCCTCCGGCGGCGTCTGACTGGAACGATCGTCGGCGTCTGACTGGCGGAACTCGAAGGGGGCAAGCTC  
.....(((((((.....)))))))).  
\*\*\*\*\*TCGACTGGCGGAACTCGAAGG\*\*\*\*\*

**novel\_mir\_70**











**Additional file 1: Figure S4 Target plats (T-plots) of identified known and novel miRNA targets using degradome sequencing. The red lines indicate signatures consistent with miRNA-directed cleavage.**

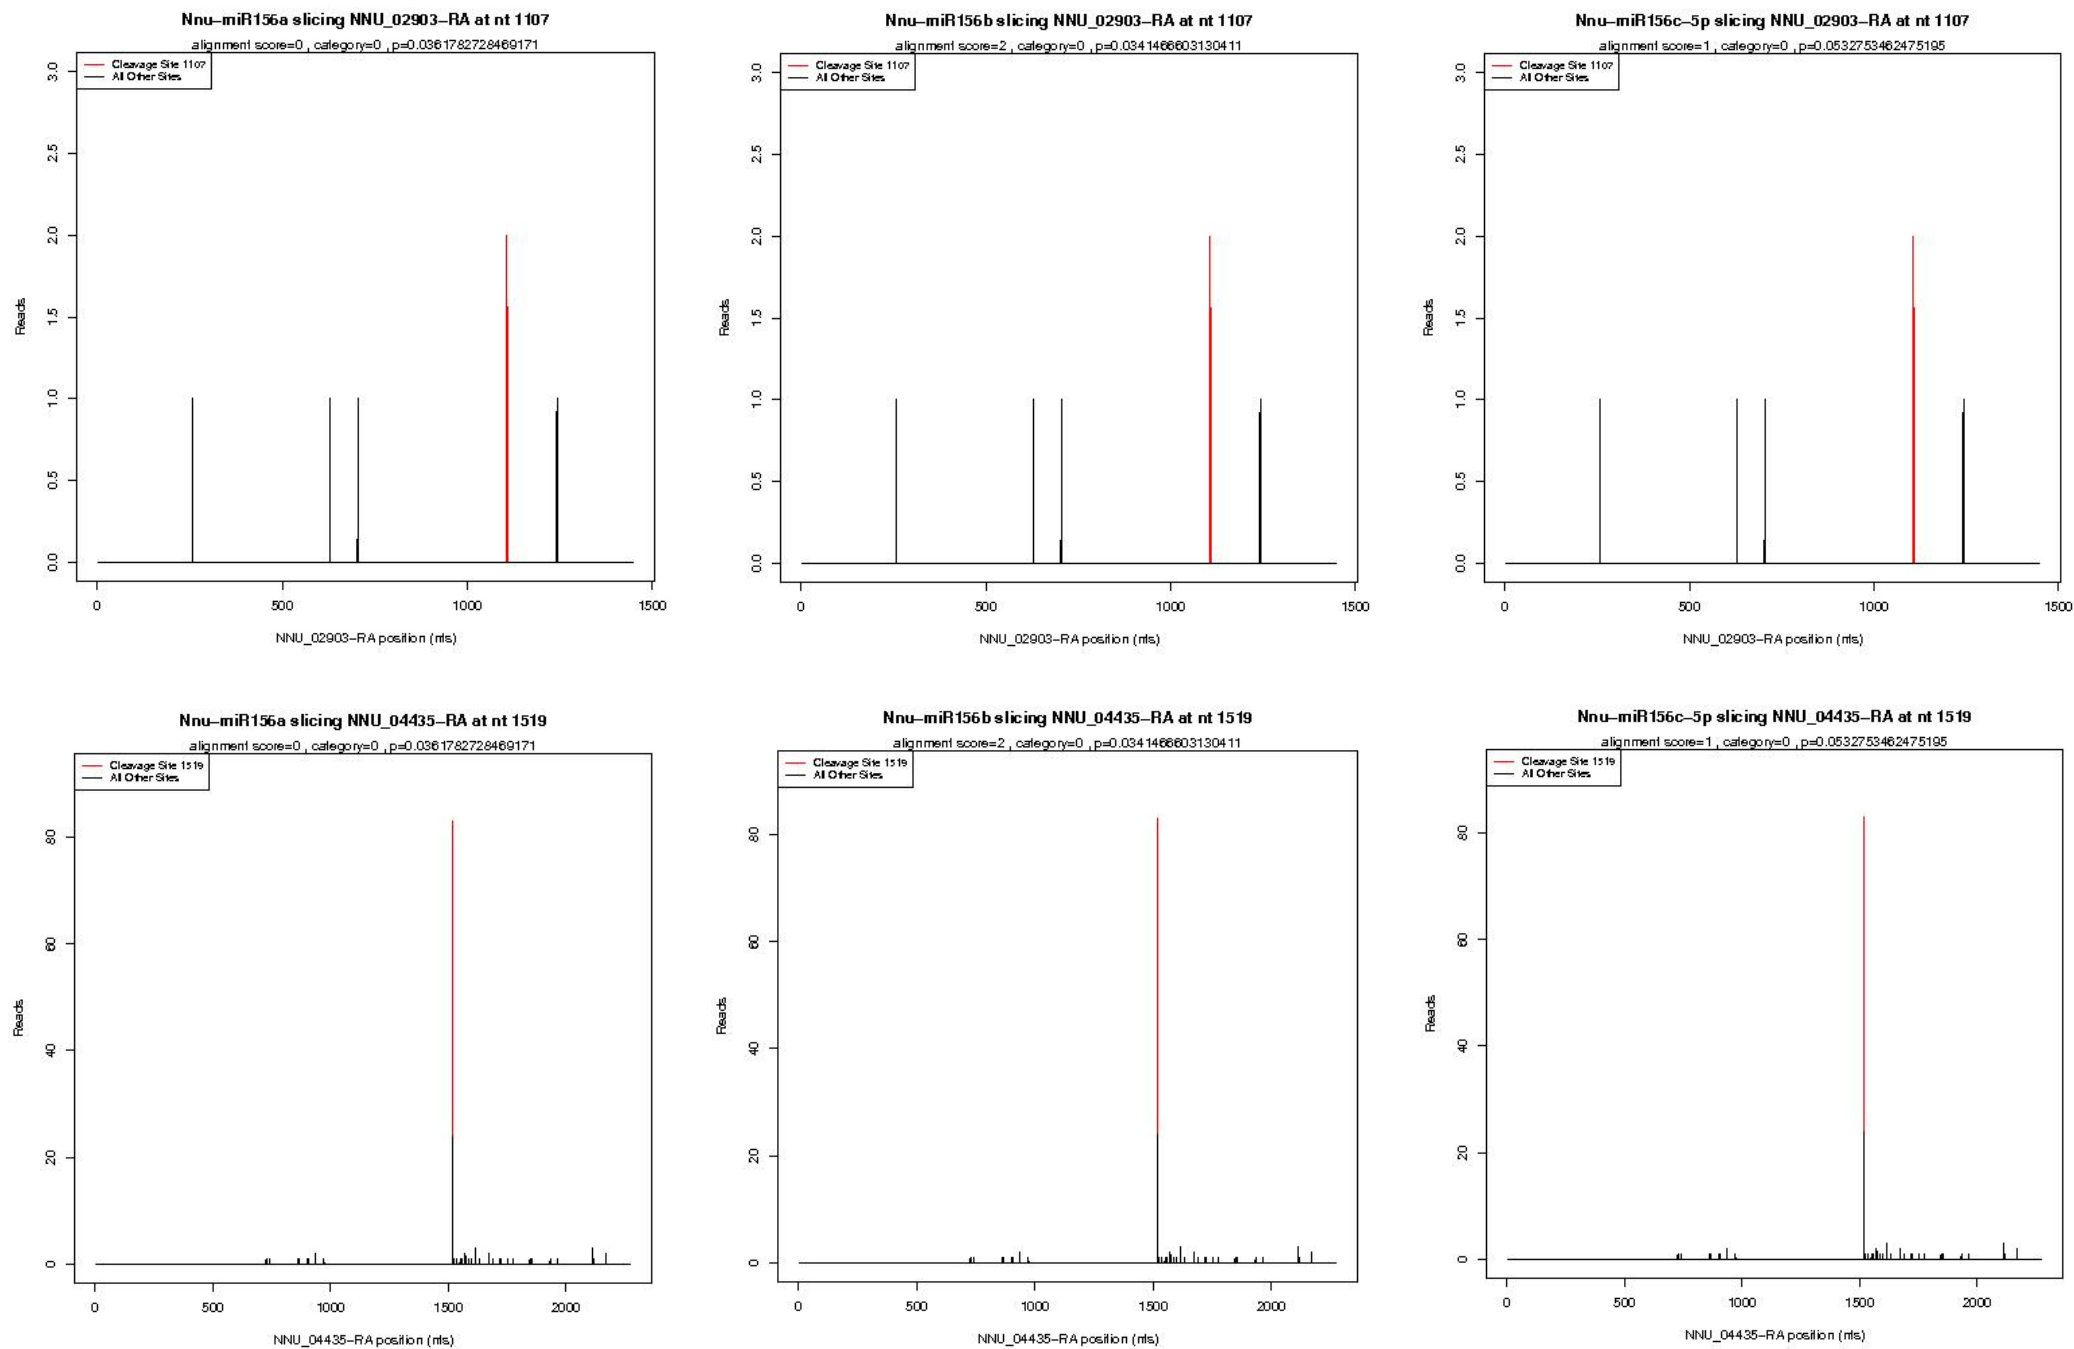

**Nnu-miR156d slicing NNU\_04435-RA at nt 1520**

alignment score=2.5 , category=2 , p=0.483613560604572

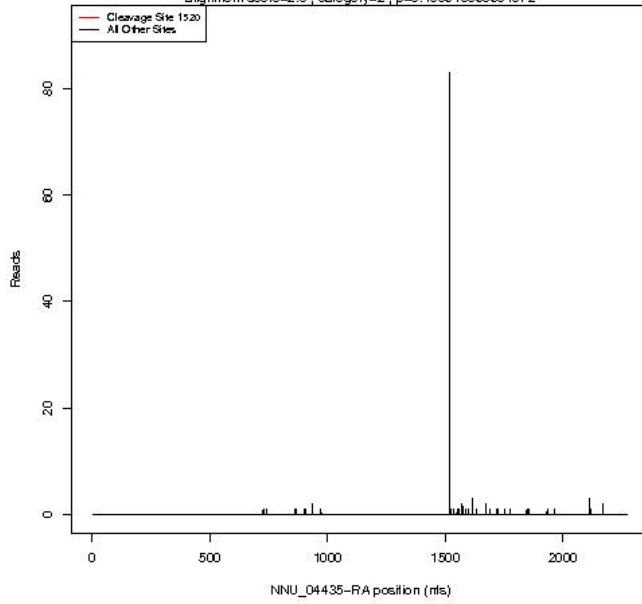

**Nnu-miR157a slicing NNU\_04435-RA at nt 1520**

alignment score=2.5 , category=2 , p=0.483613560604572

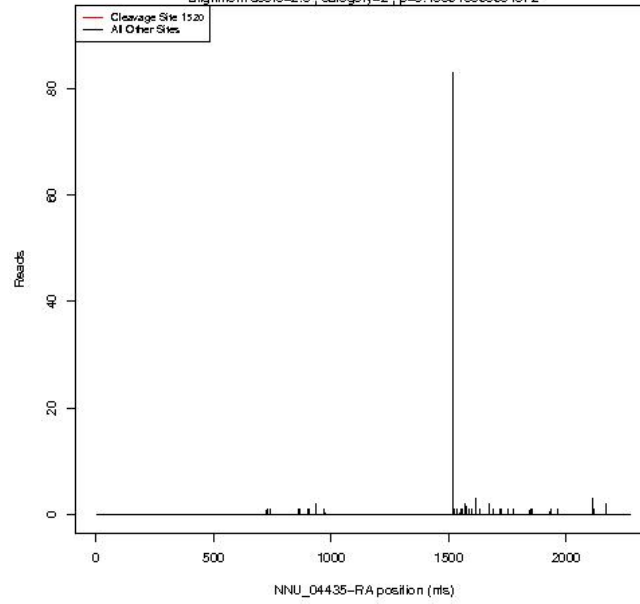

**Nnu-miR157b-5p slicing NNU\_04435-RA at nt 1520**

alignment score=2.5 , category=2 , p=0.483613560604572

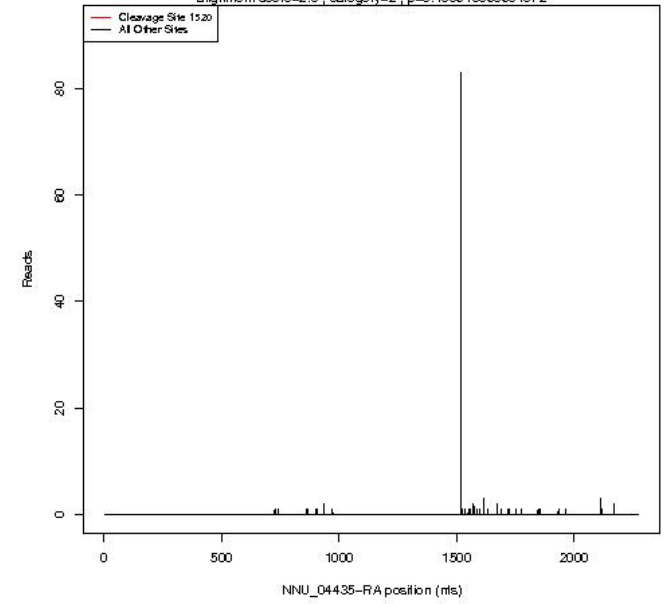

**Nnu-miR157c slicing NNU\_04435-RA at nt 1520**

alignment score=2.5 , category=2 , p=0.483613560604572

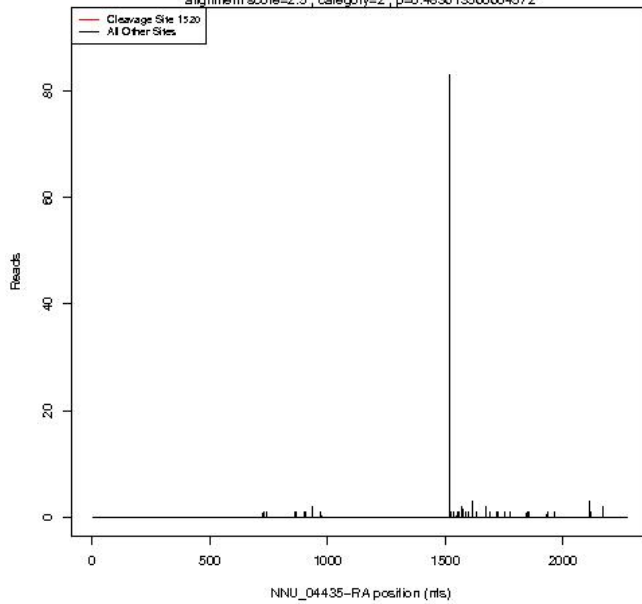

**Nnu-miR156d slicing NNU\_11616-RA at nt 454**

alignment score=2 , category=1 , p=0.0291824396573757

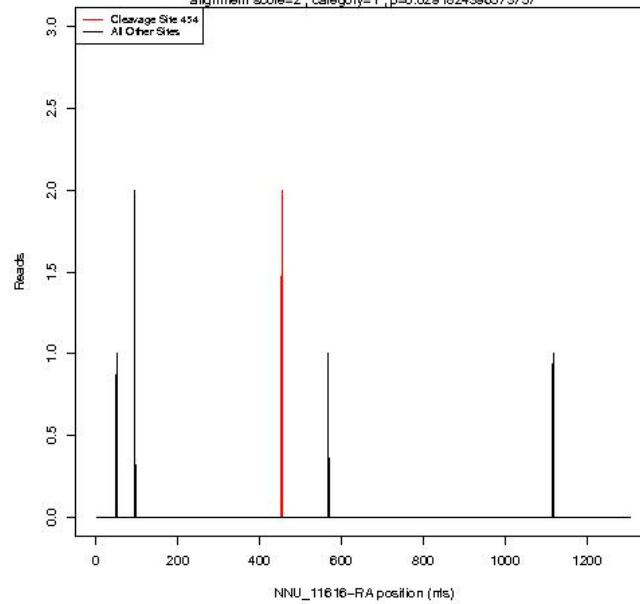

**Nnu-miR157a slicing NNU\_11616-RA at nt 454**

alignment score=2 , category=1 , p=0.0291824396573757

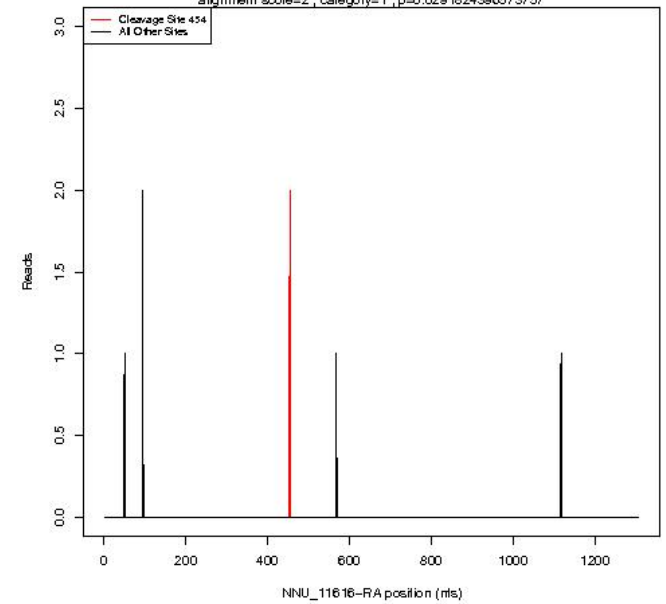



**Nnu-miR157b-5p slicing NNU\_11616-RA at nt 454**

alignment score=2, category=1, p=0.0291824396573757

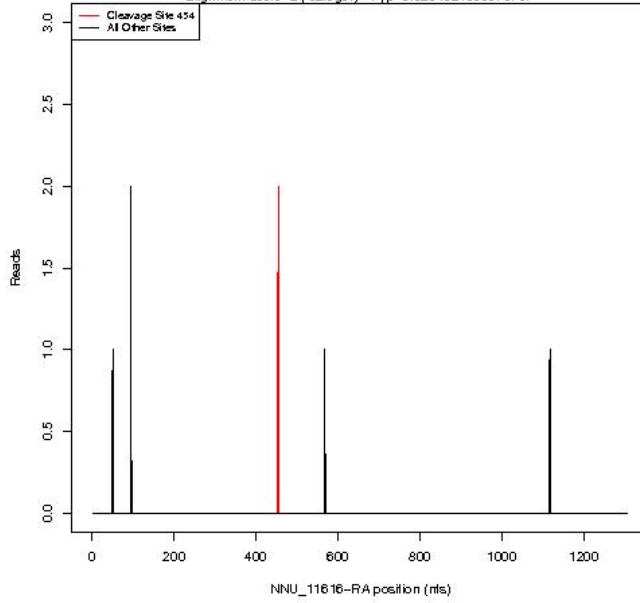

**Nnu-miR157c slicing NNU\_11616-RA at nt 454**

alignment score=2, category=1, p=0.0291824396573757

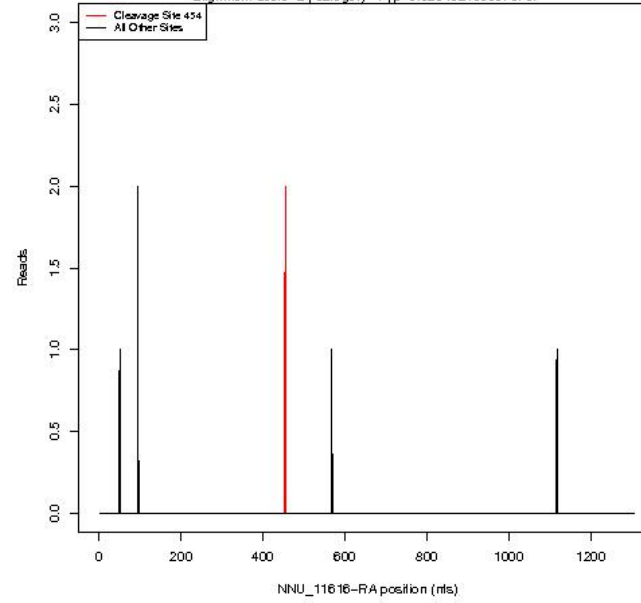

**Nnu-miR160a slicing NNU\_12564-RA at nt 1549**

alignment score=1, category=0, p=0.00908299549868641

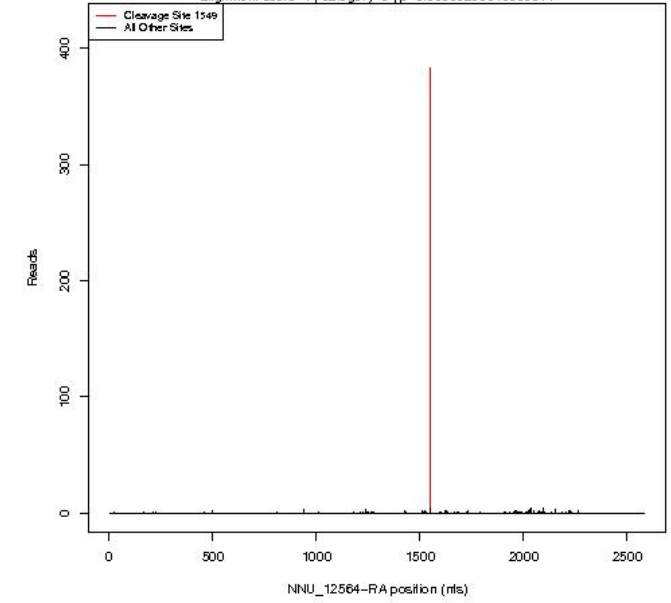

**Nnu-miR160b slicing NNU\_12564-RA at nt 1549**

alignment score=2, category=0, p=0.00769100030255943

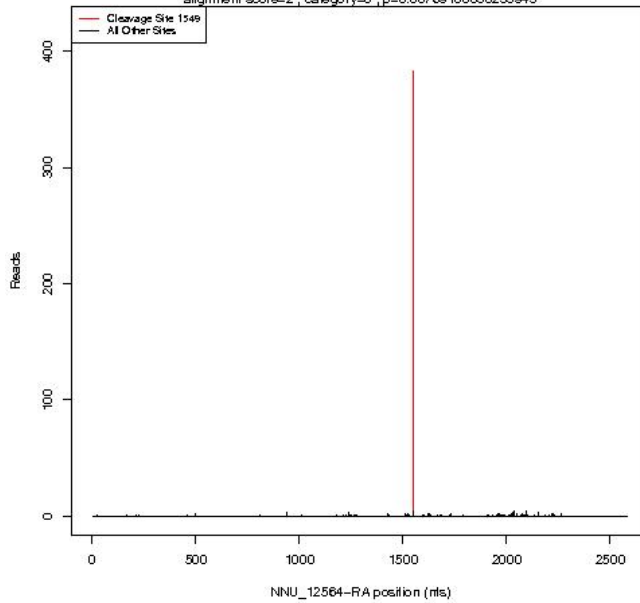

**Nnu-miR160a slicing NNU\_13132-RA at nt 2599**

alignment score=1, category=0, p=0.00908299549868641

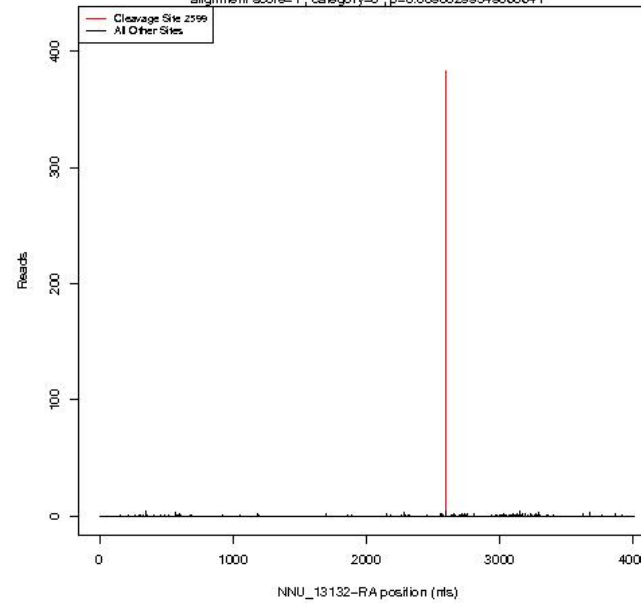

**Nnu-miR160b slicing NNU\_13132-RA at nt 2599**

alignment score=2, category=0, p=0.00769100030255943

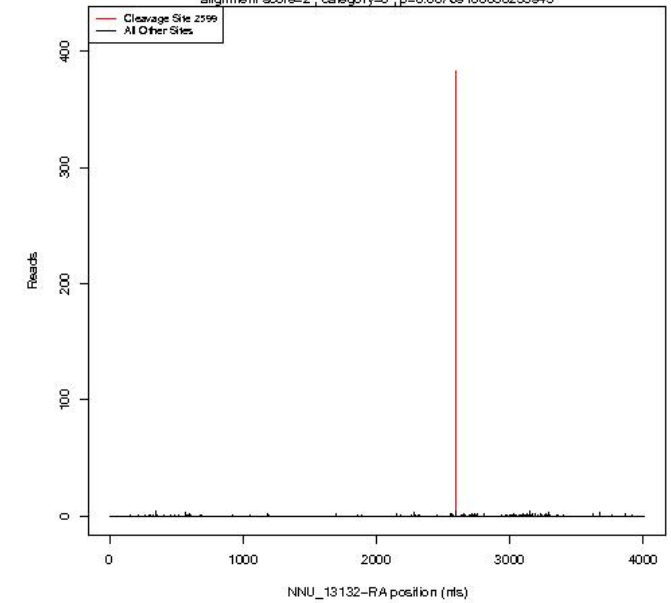

**Nnu-miR165a-5p slicing NNU\_13147-RA at nt 2089**

alignment score=1.5 , category=0 , p=0.0249512789812312

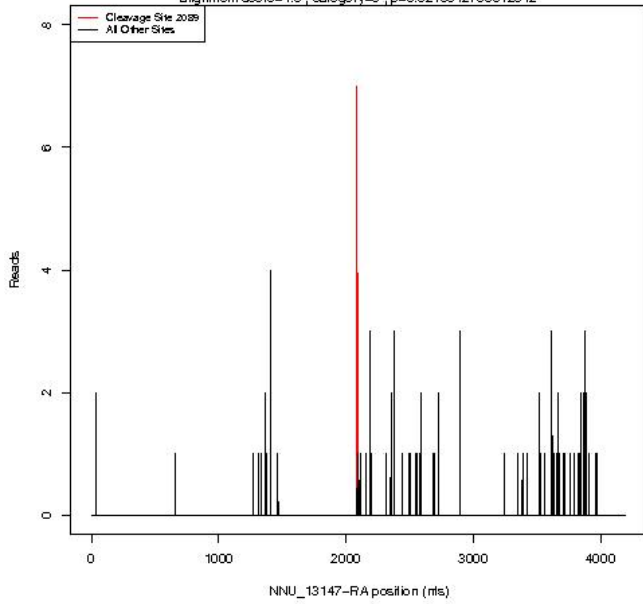

**Nnu-miR166c slicing NNU\_13147-RA at nt 2089**

alignment score=3 , category=0 , p=0.0249512789812312

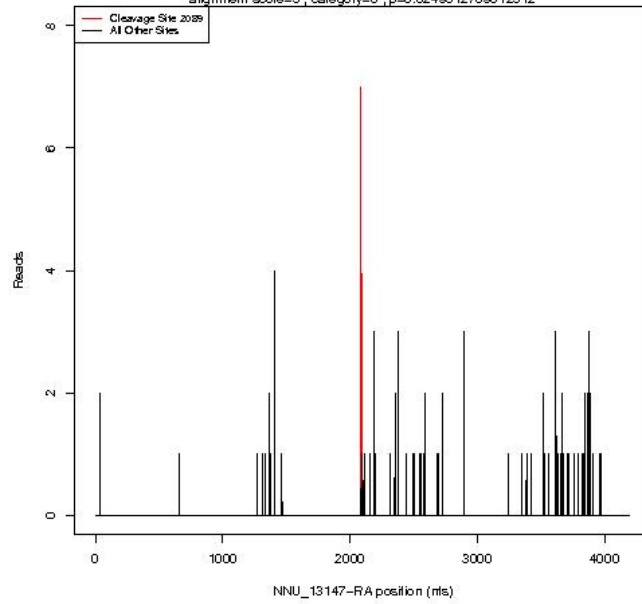

**Nnu-miR164a-5p slicing NNU\_25930-RA at nt 1344**

alignment score=3 , category=4 , p=0.331183603537808

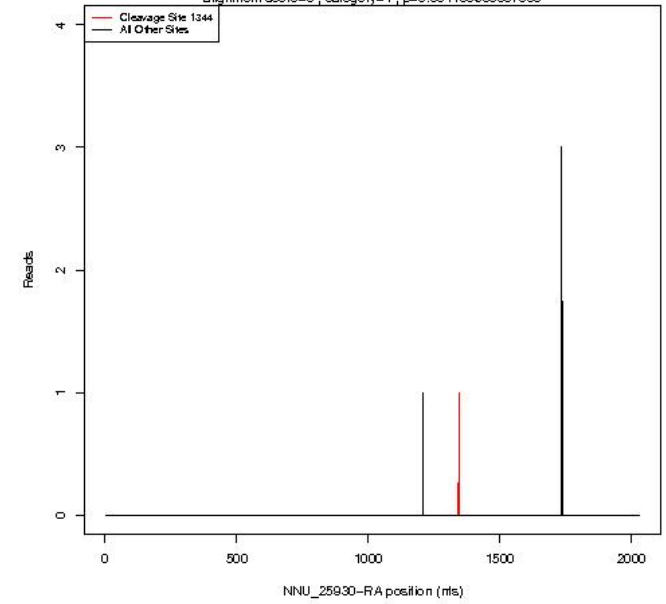

**Nnu-miR165a-5p slicing NNU\_26074-RA at nt 2321**

alignment score=1.5 , category=0 , p=0.0249512789812312

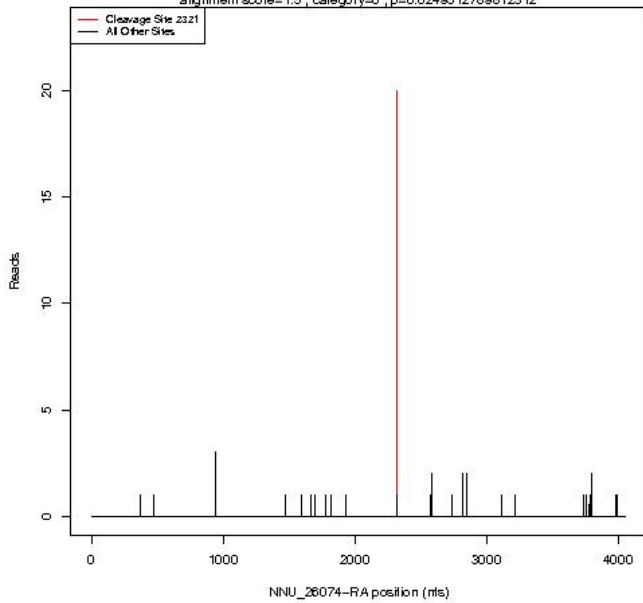

**Nnu-miR166c slicing NNU\_26074-RA at nt 2321**

alignment score=3 , category=0 , p=0.0249512789812312

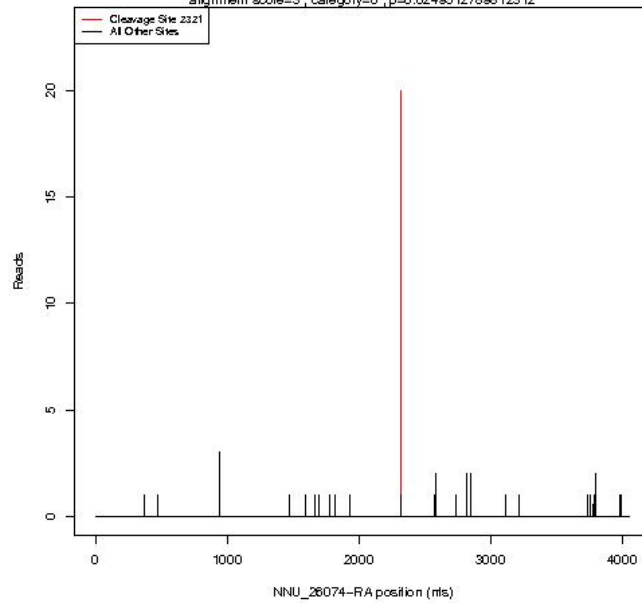

**Nnu-miR169a slicing NNU\_05128-RA at nt 1679**

alignment score=2.5 , category=0 , p=0.00699426959672722

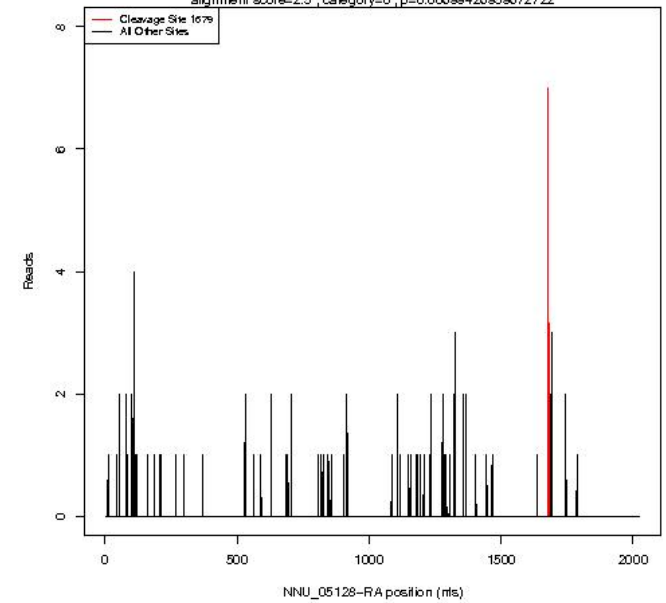

**Nnu-miR169b slicing NNU\_05128-RA at nt 1679**

alignment score=3 , category=0 , p=0.0125544465547638

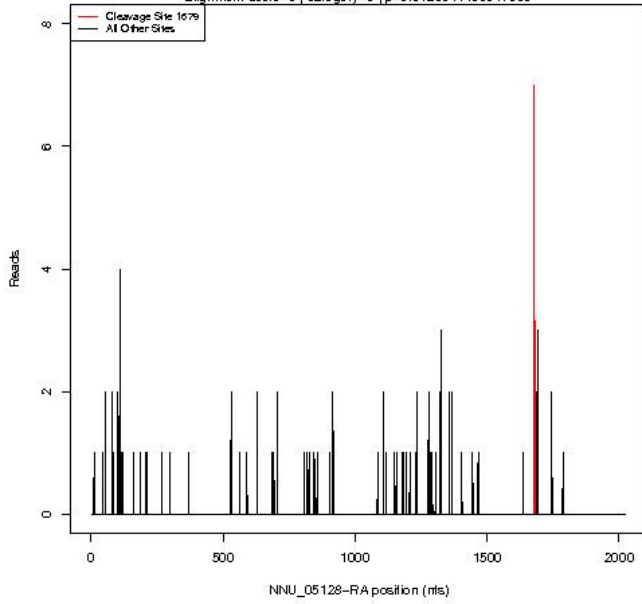

**Nnu-miR169c-5p slicing NNU\_05128-RA at nt 1679**

alignment score=3 , category=0 , p=0.00629704969481137

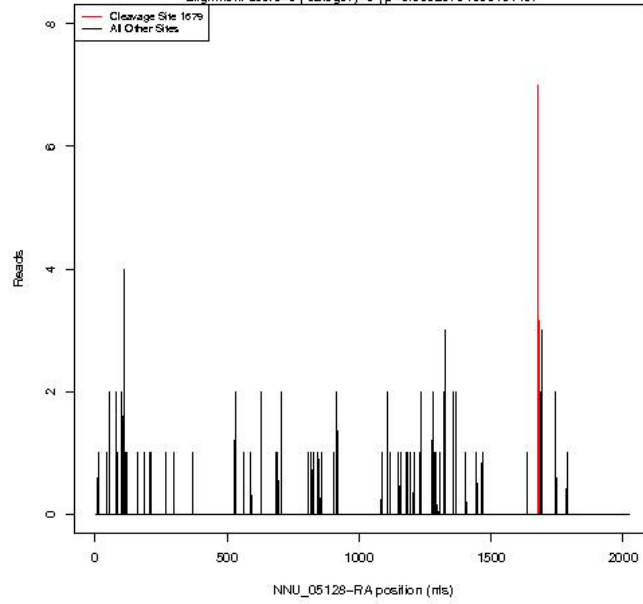

**Nnu-miR168a-5p slicing NNU\_03240-RA at nt 427**

alignment score=3 , category=0 , p=0.0031534971194469

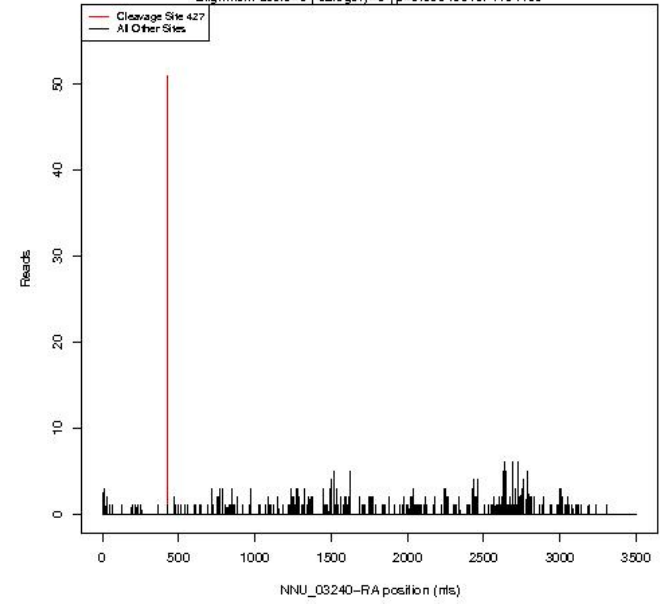

**Nnu-miR169d slicing NNU\_05128-RA at nt 1679**

alignment score=3 , category=0 , p=0.00629704969481137

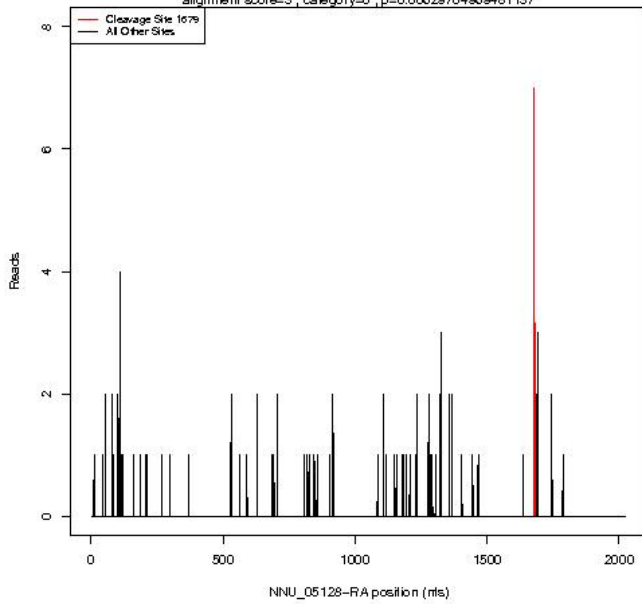

**Nnu-miR165a-5p slicing NNU\_10620-RA at nt 1072**

alignment score=1.5 , category=0 , p=0.0249512789812312

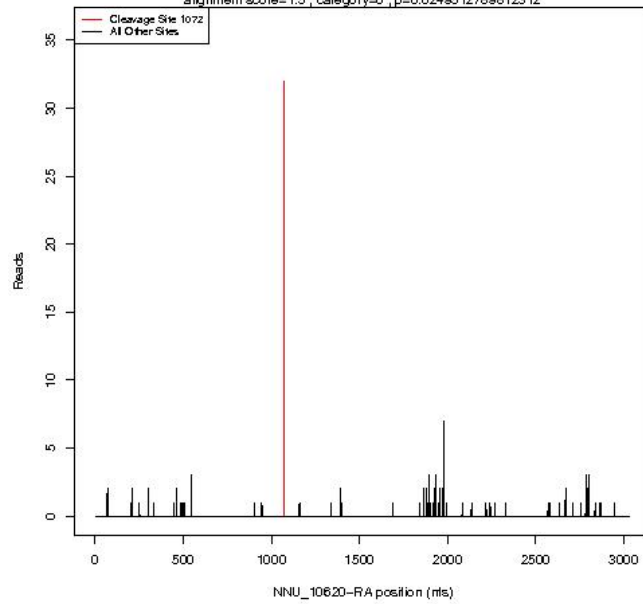

**Nnu-miR166c slicing NNU\_10620-RA at nt 1072**

alignment score=3 , category=0 , p=0.0249512789812312

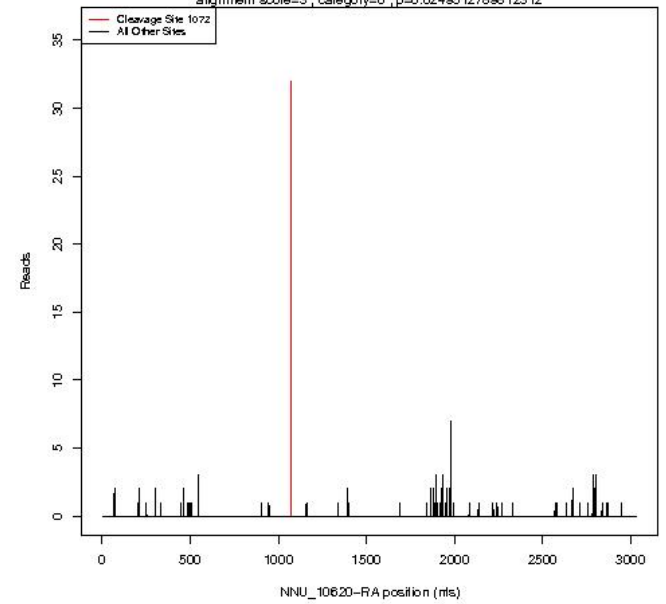

**Nnu-miR159b slicing NNU\_10896-RA at nt 1284**

alignment score=0, category=0, p=0.015668353263164

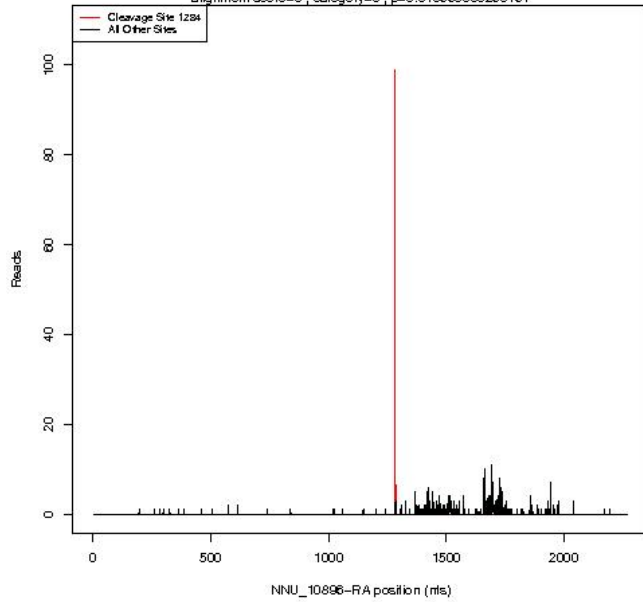

**Nnu-miR169a slicing NNU\_25112-RA at nt 562**

alignment score=3.5, category=1, p=0.00358346905717755

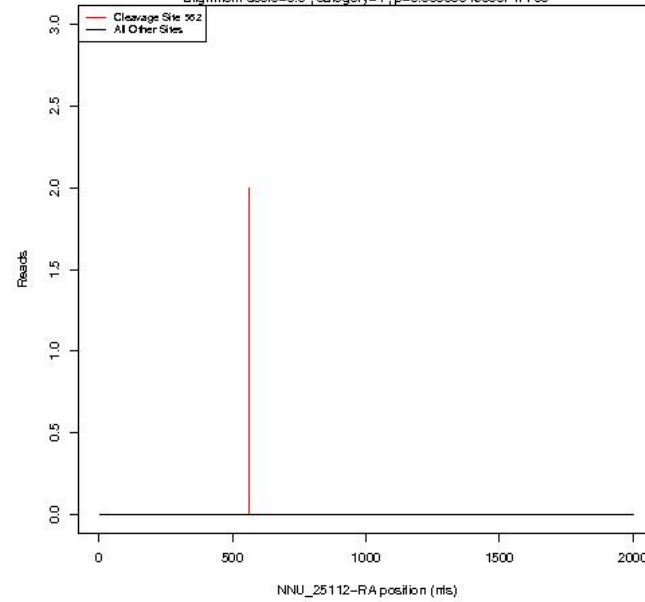

**Nnu-miR169b slicing NNU\_25112-RA at nt 562**

alignment score=3, category=1, p=0.0160247874855504

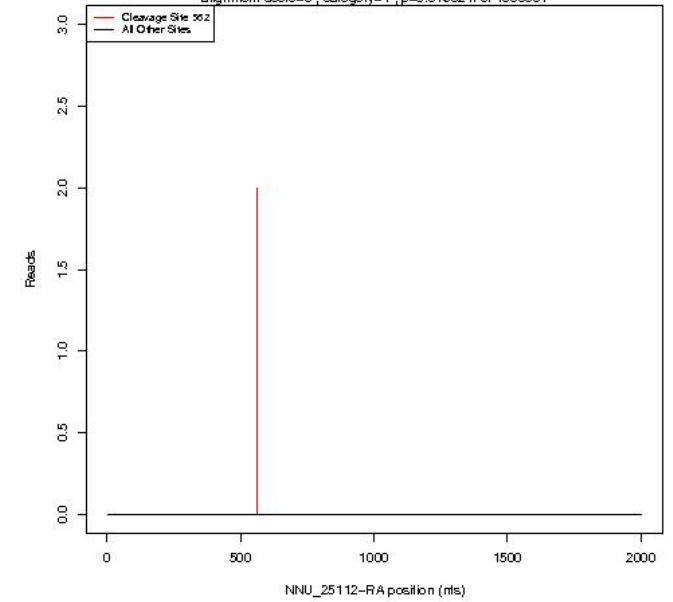

**Nnu-miR169c-5p slicing NNU\_25112-RA at nt 562**

alignment score=4, category=1, p=0.0062626412600959

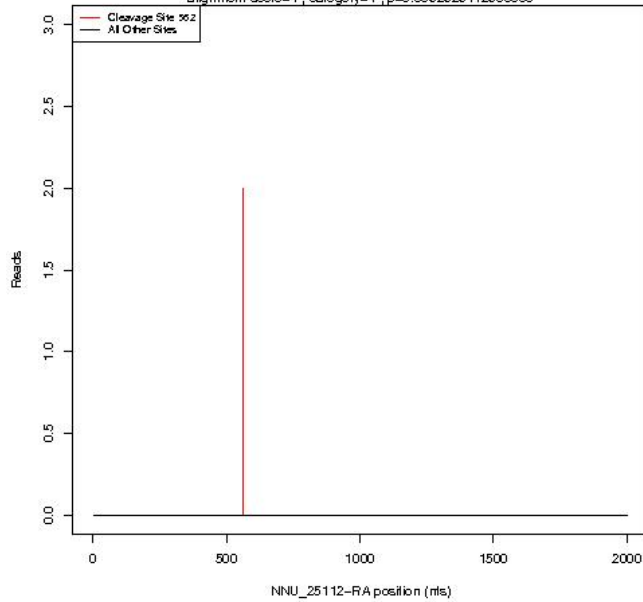

**Nnu-miR169d slicing NNU\_25112-RA at nt 562**

alignment score=4, category=1, p=0.0062626412600959

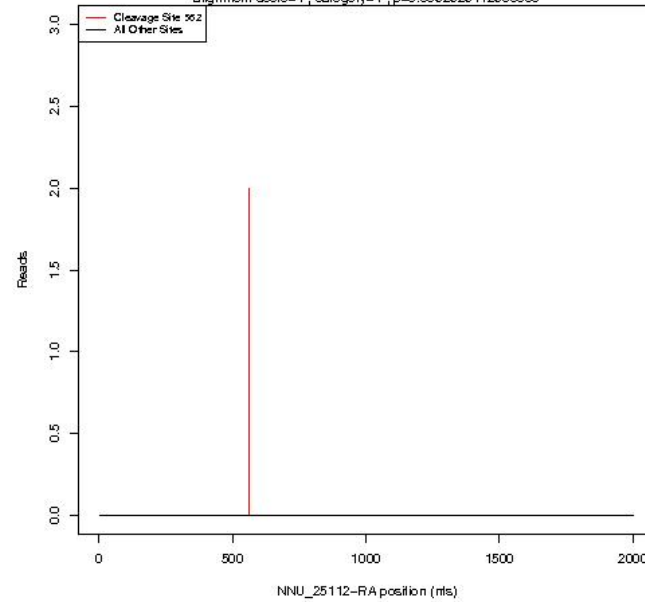

**Slo-miR169m slicing NNU\_25112-RA at nt 562**

alignment score=4, category=1, p=0.00937923874908142

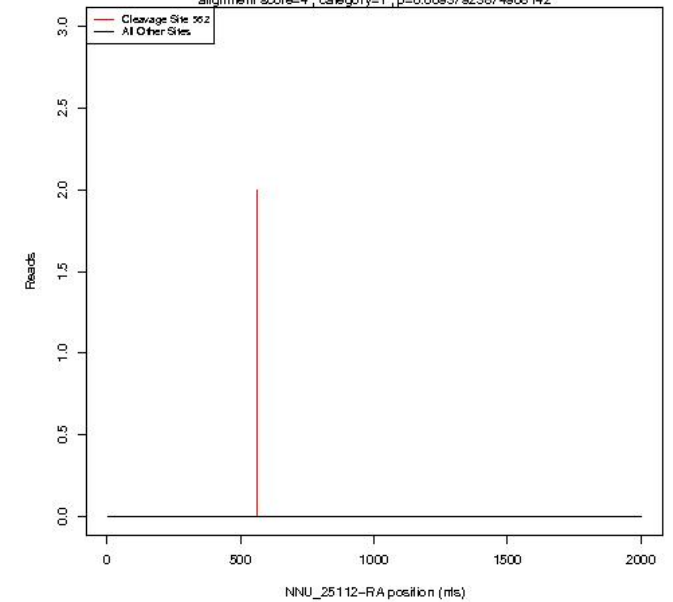

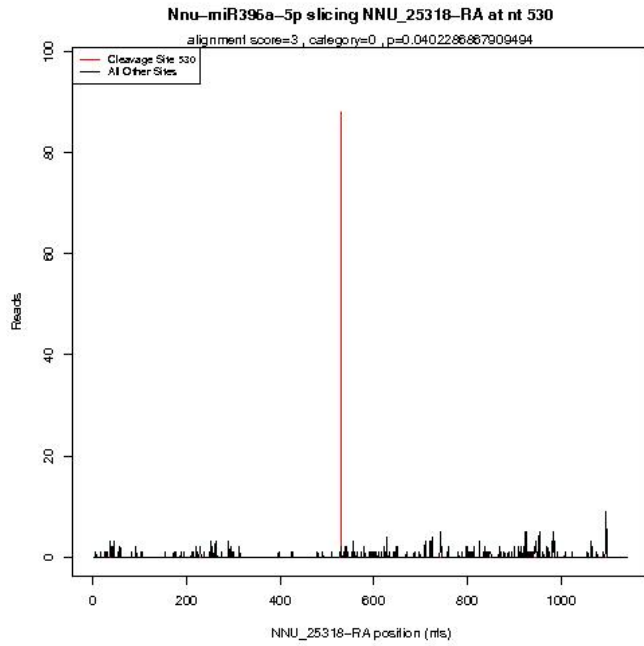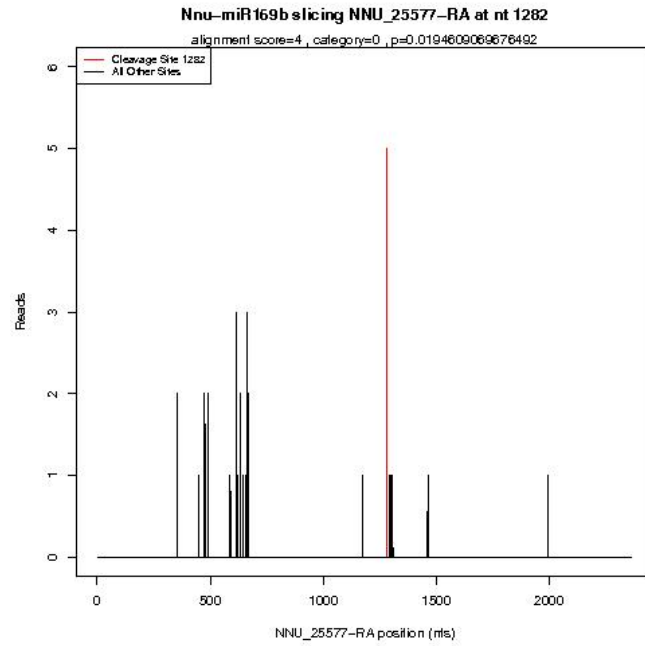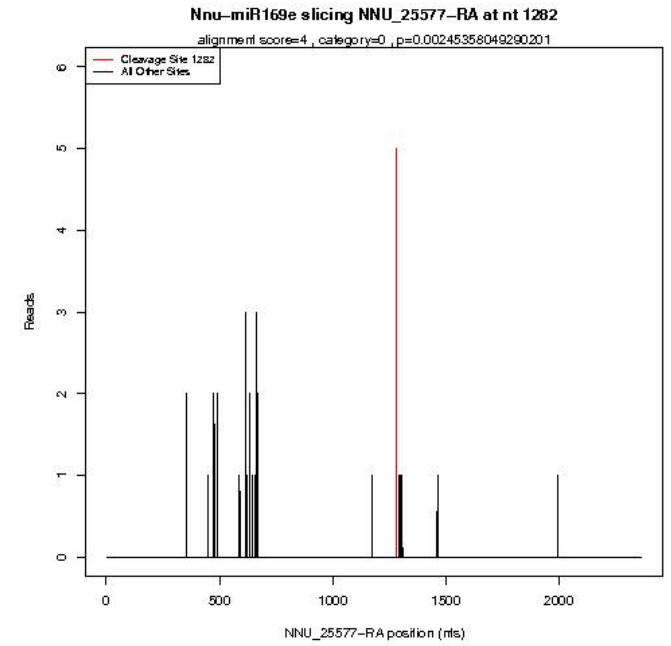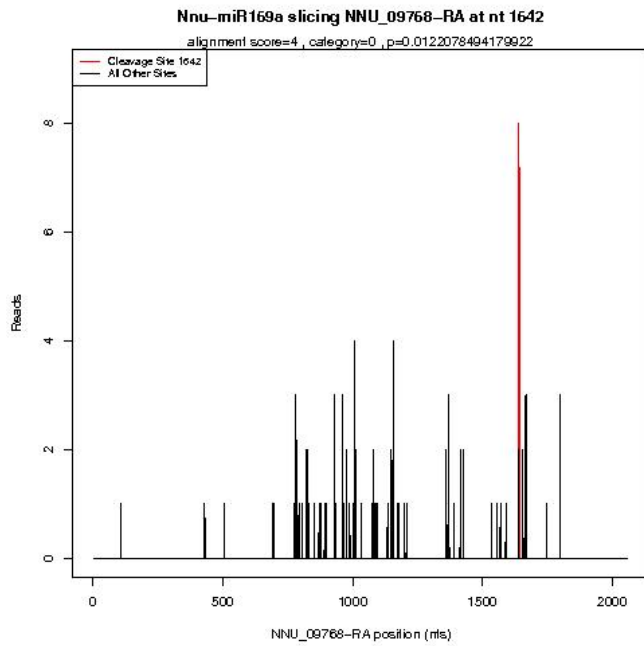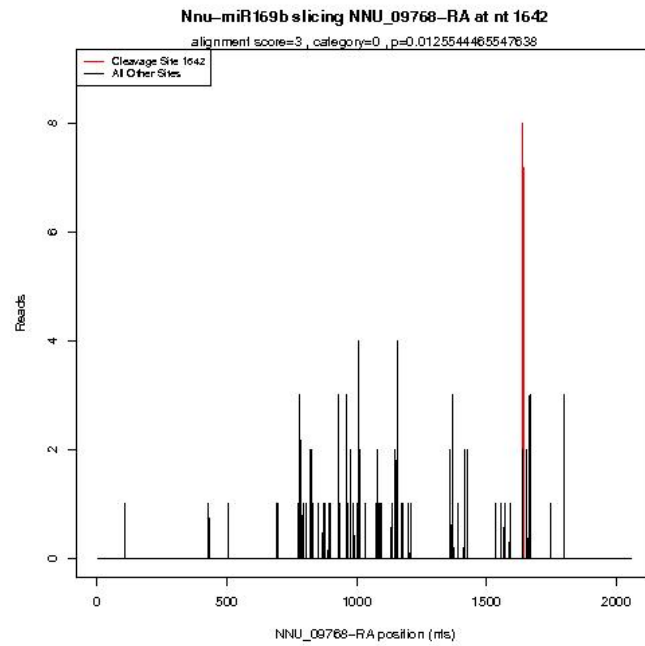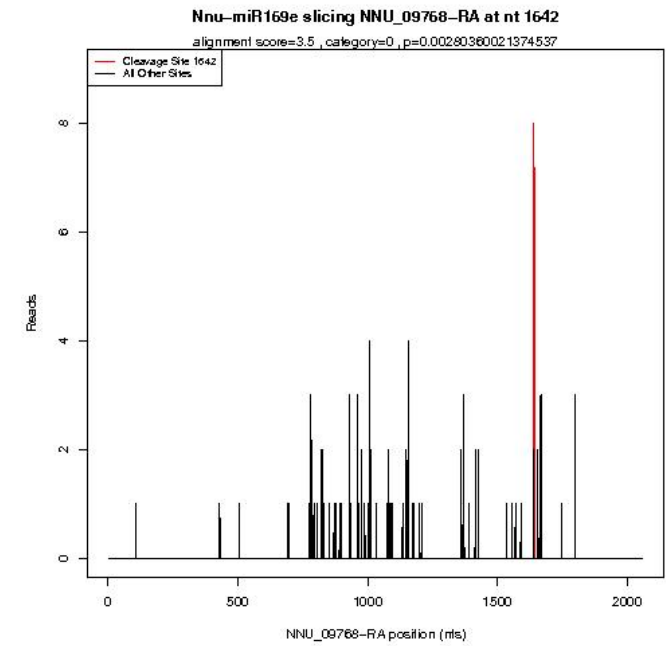

**Nnu-miR164a-5p slicing NNU\_07308-RA at nt 1085**

alignment score=4 , category=1 , p=0.00937923874908142

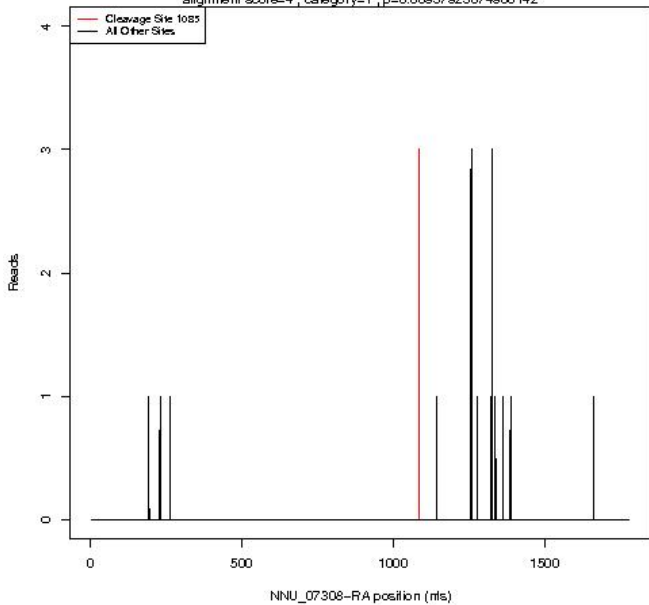

**Nnu-miR171b slicing NNU\_08210-RA at nt 350**

alignment score=2.5 , category=4 , p=0.200260983600585

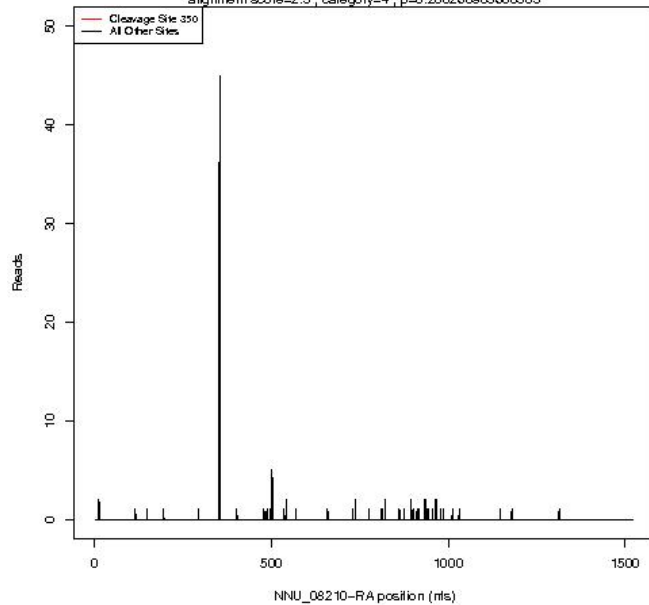

**Nnu-miR170a slicing NNU\_08210-RA at nt 353**

alignment score=2.5 , category=0 , p=0.00350327125310002

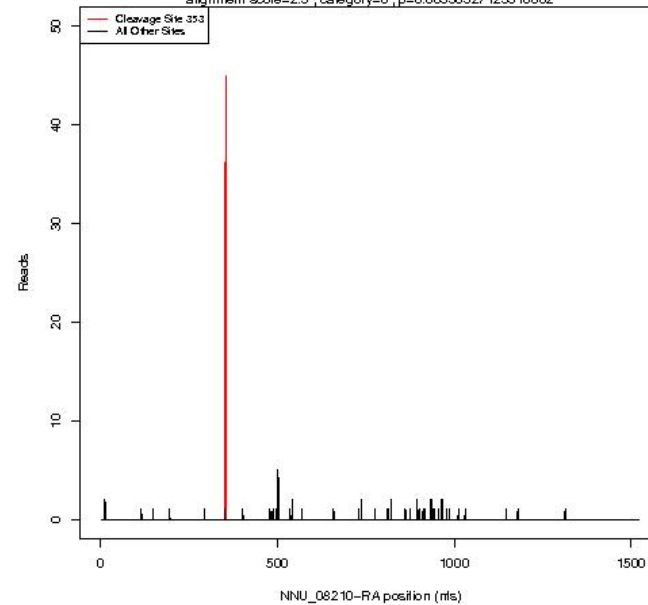

**Nnu-miR170b slicing NNU\_08210-RA at nt 353**

alignment score=2.5 , category=0 , p=0.00350327125310002

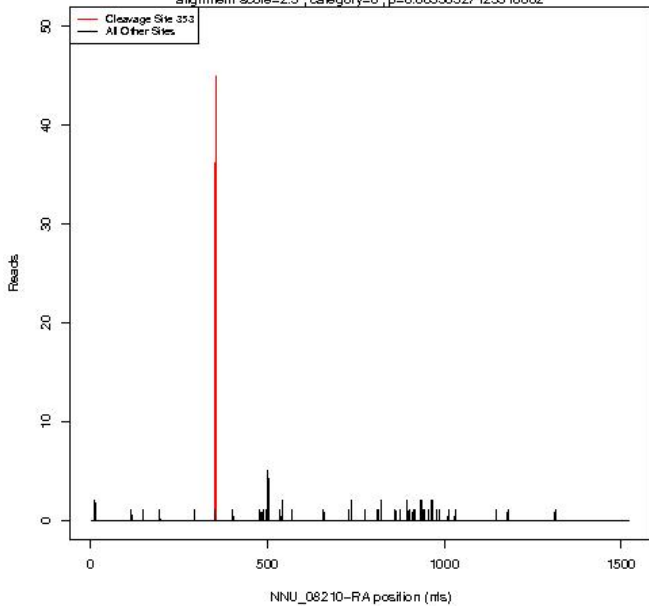

**Nnu-miR171c slicing NNU\_08210-RA at nt 350**

alignment score=2.5 , category=4 , p=0.200260983600585

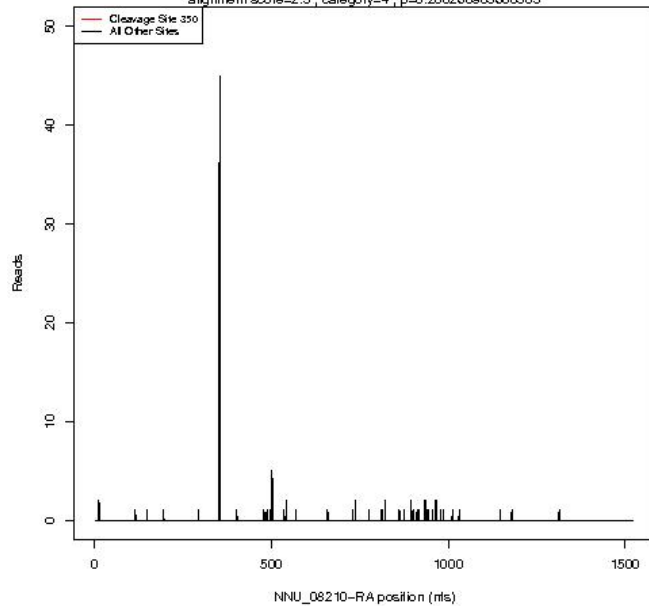

**Nnu-miR170a slicing NNU\_05428-RA at nt 629**

alignment score=1 , category=0 , p=0.0180834901901437

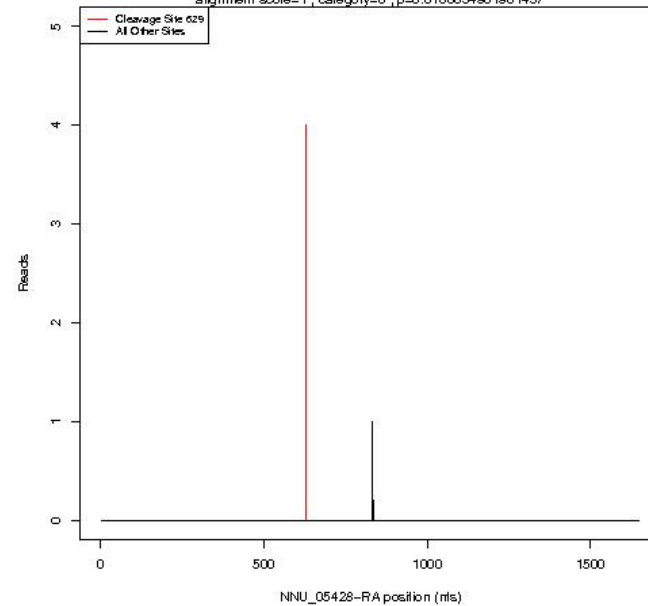

**Nnu-miR170b slicing NNU\_05428-RA at nt 629**

alignment score=1, category=0, p=0.0180834901901437

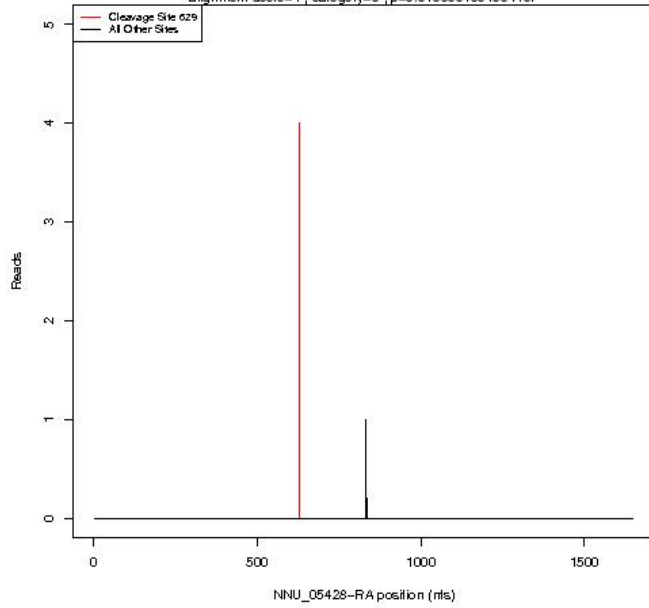

**Nnu-miR171a slicing NNU\_05428-RA at nt 629**

alignment score=1, category=0, p=0.0180834901901437

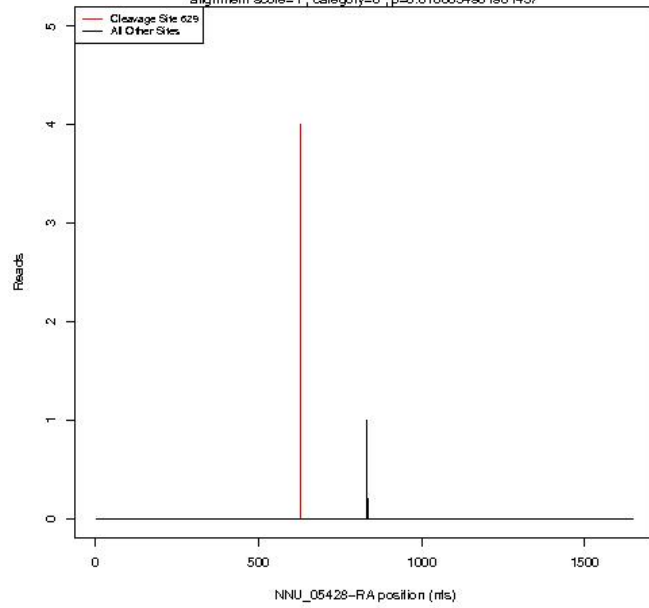

**Nnu-miR171d slicing NNU\_05428-RA at nt 629**

alignment score=1.5, category=0, p=0.0167041384801172

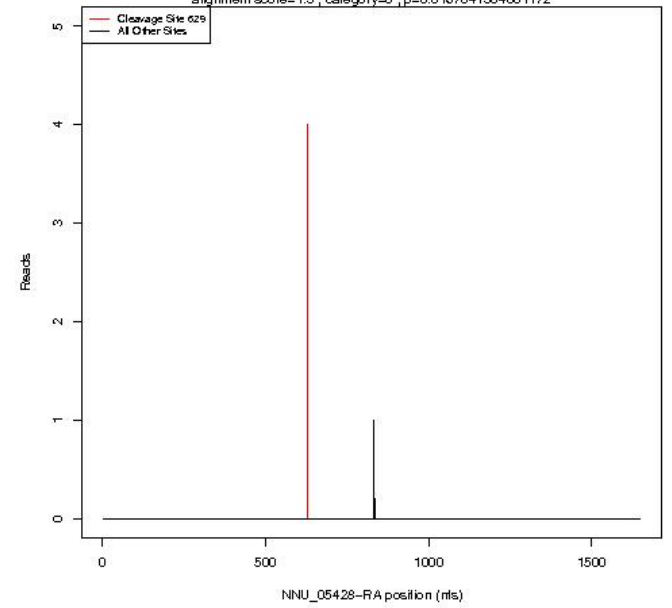

**Nnu-miR319b slicing NNU\_00026-RA at nt 2081**

alignment score=2.5, category=0, p=0.0139396193862626

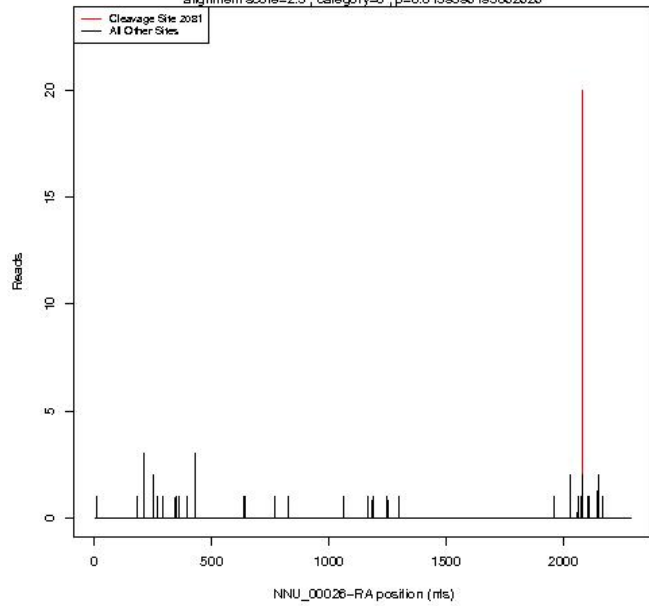

**Nnu-miR319b slicing NNU\_00229-RA at nt 1550**

alignment score=4, category=0, p=0.00977826067473619

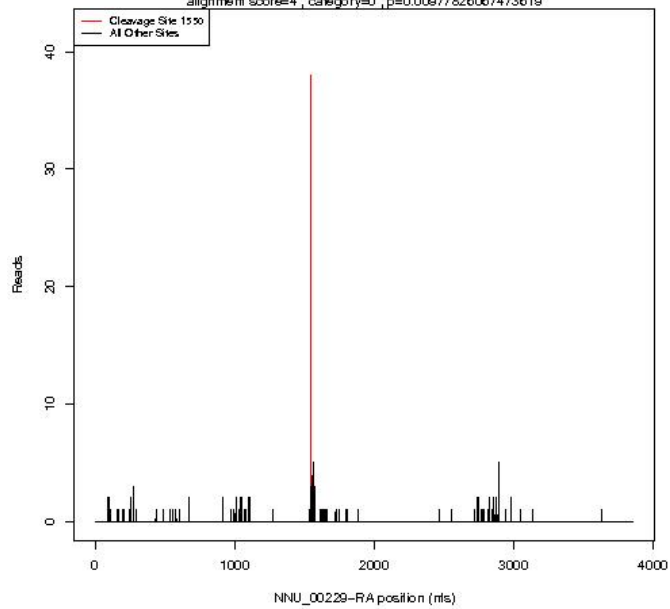

**Nnu-miR393a-5p slicing NNU\_01291-RA at nt 1689**

alignment score=2, category=0, p=0.00769100030255943

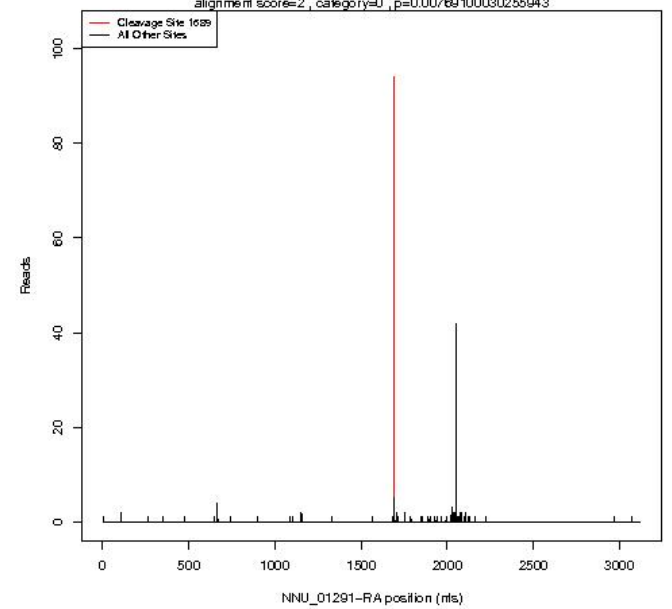

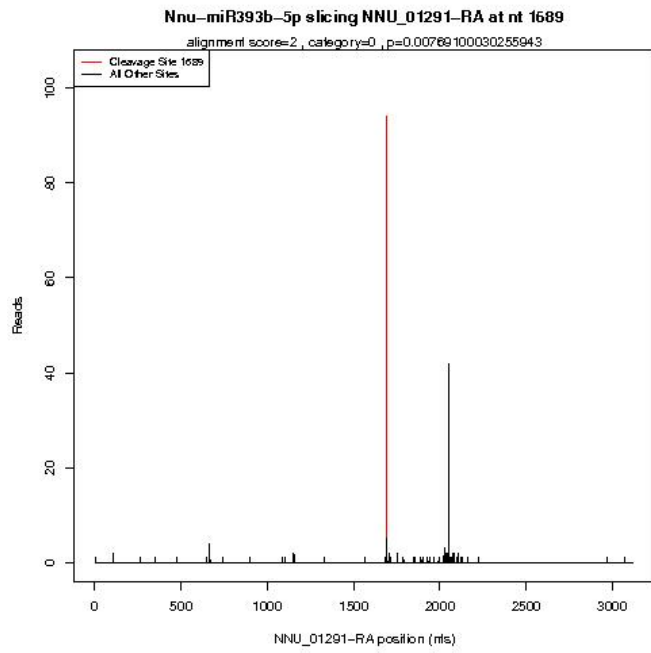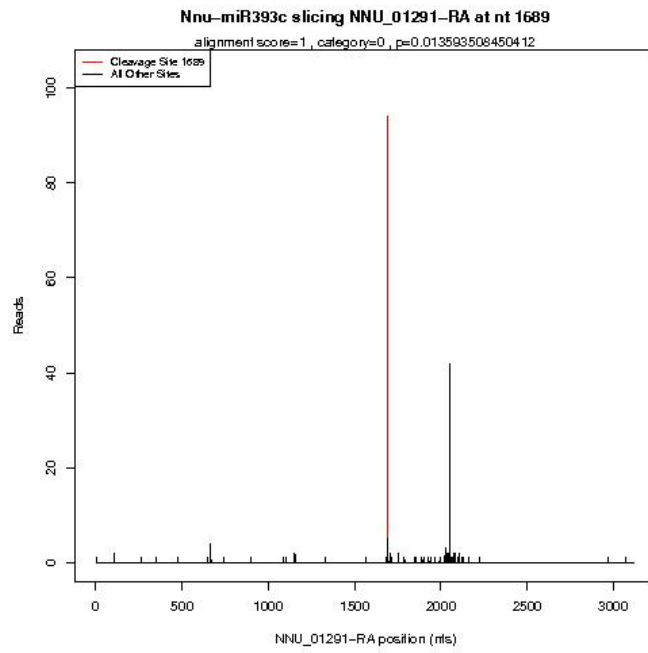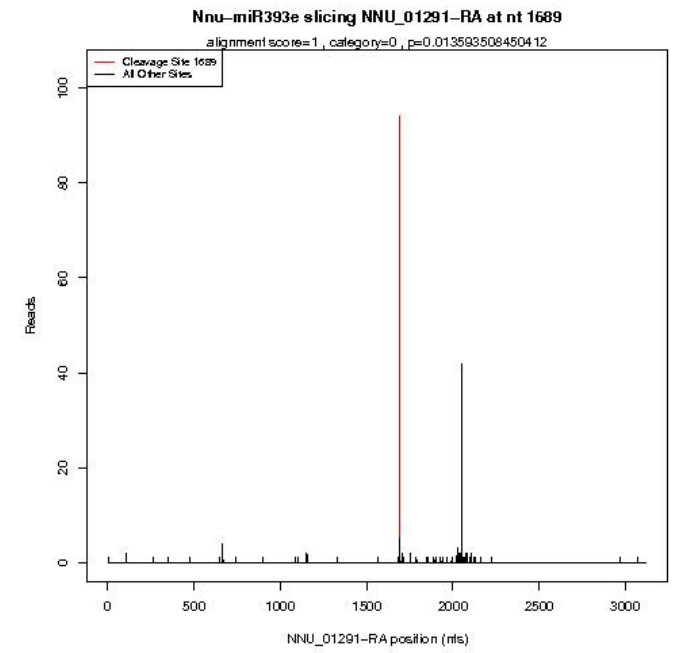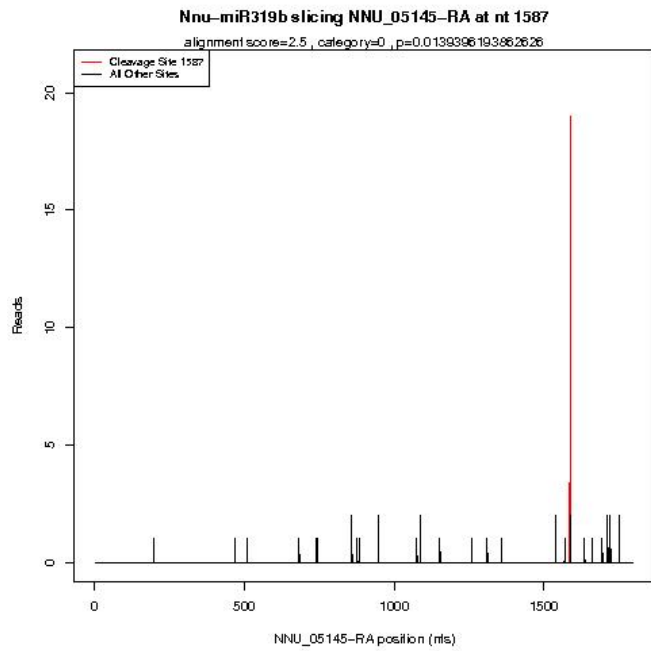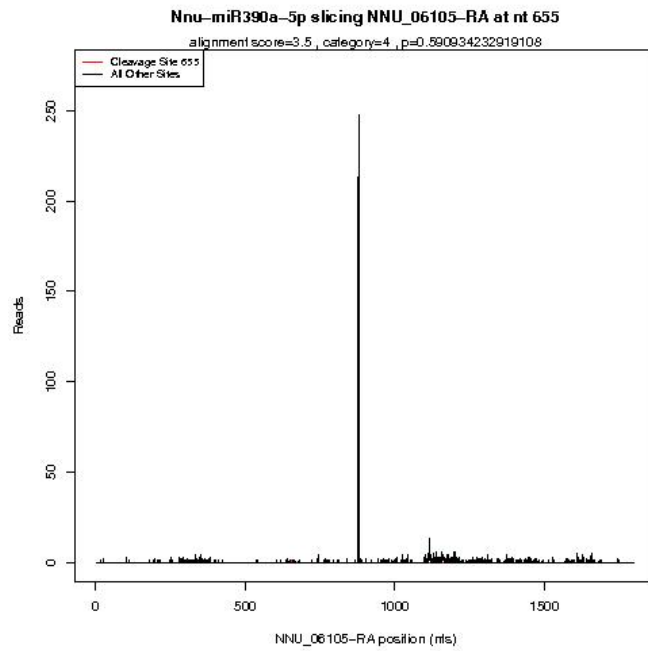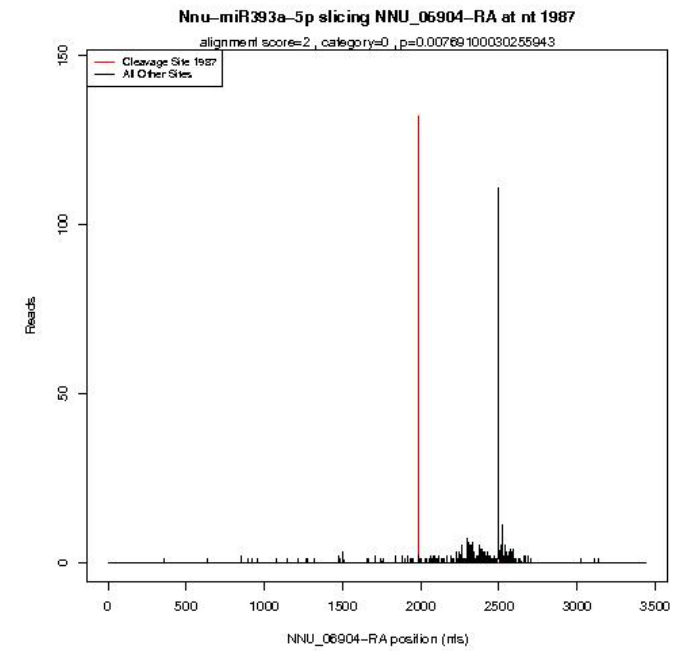



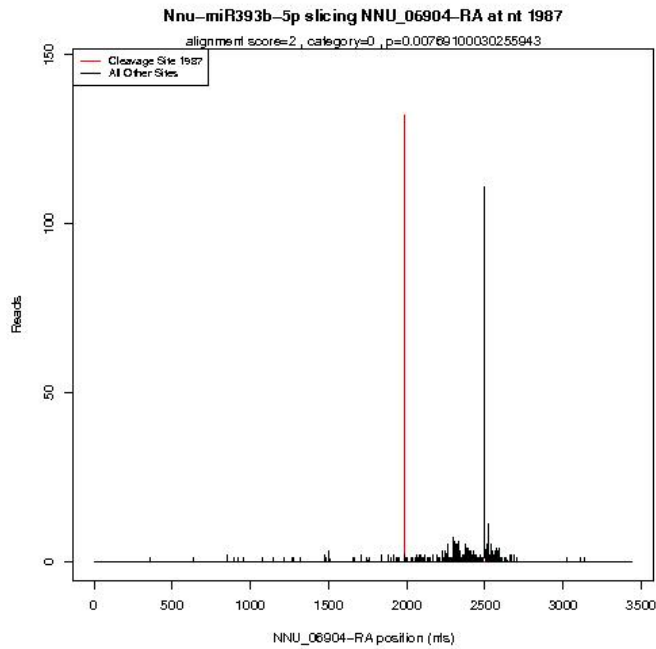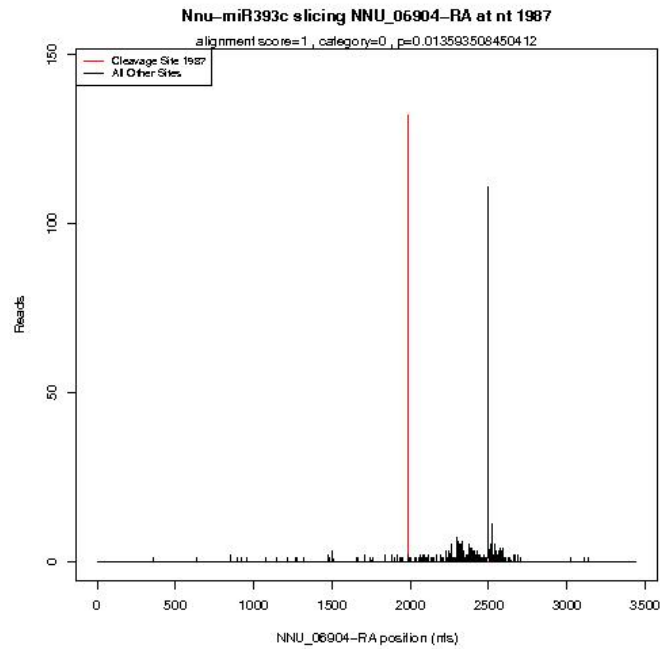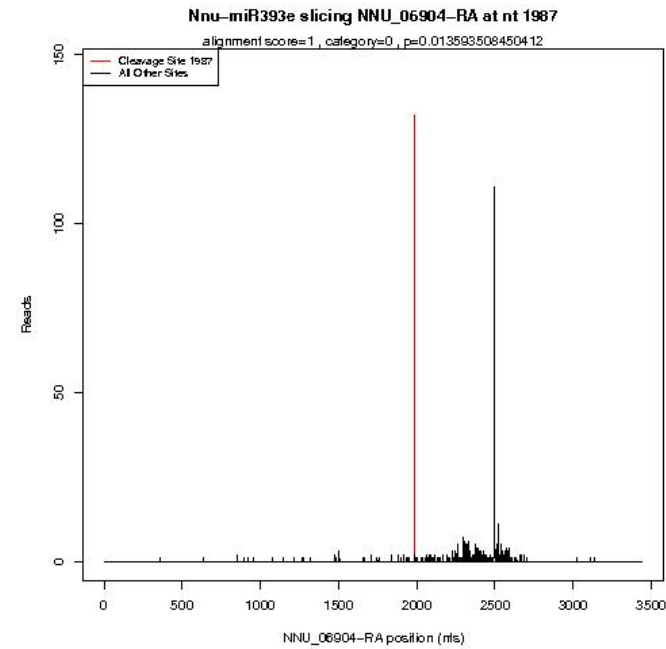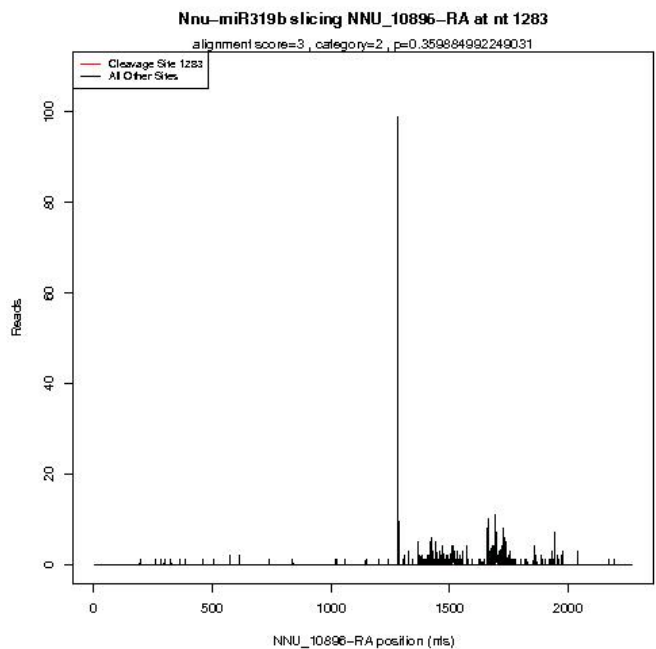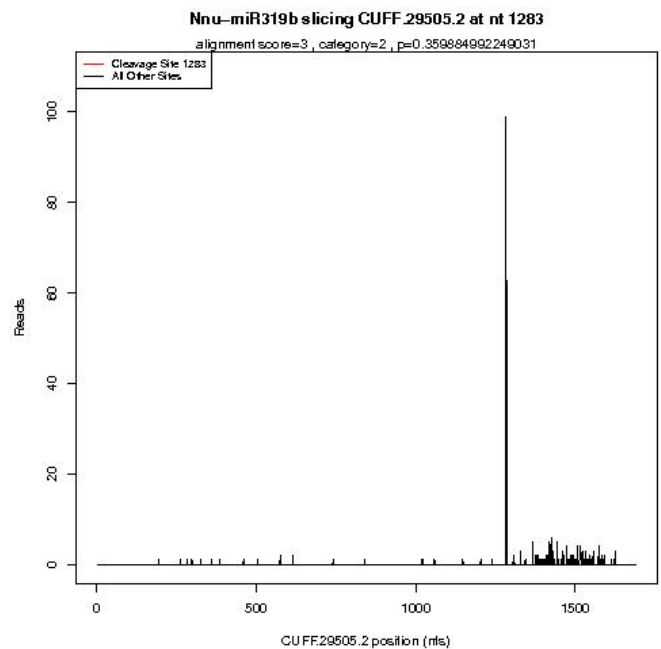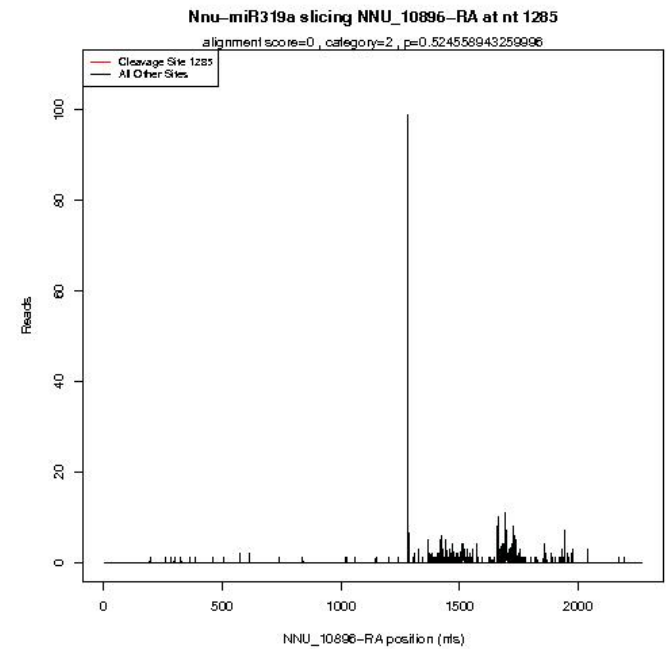

**Nnu-miR394a slicing NNU\_02060-RA at nt 2728**

alignment score=1, category=2, p=0.475010692483619

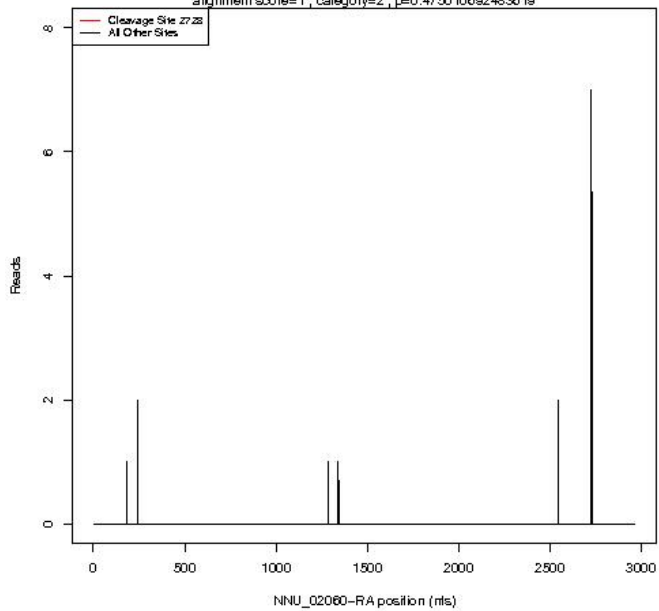

**Nnu-miR394b slicing NNU\_02060-RA at nt 2728**

alignment score=1, category=2, p=0.475010692483619

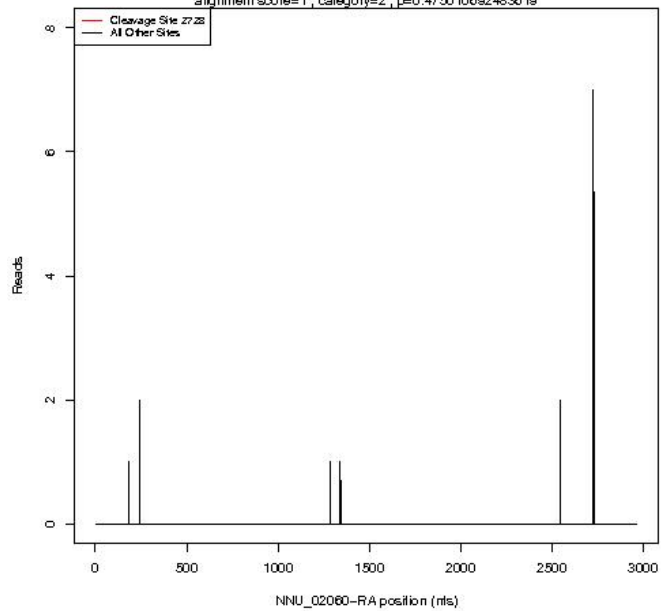

**Nnu-miR394a slicing NNU\_03785-RA at nt 2209**

alignment score=4, category=4, p=0.821062325711081

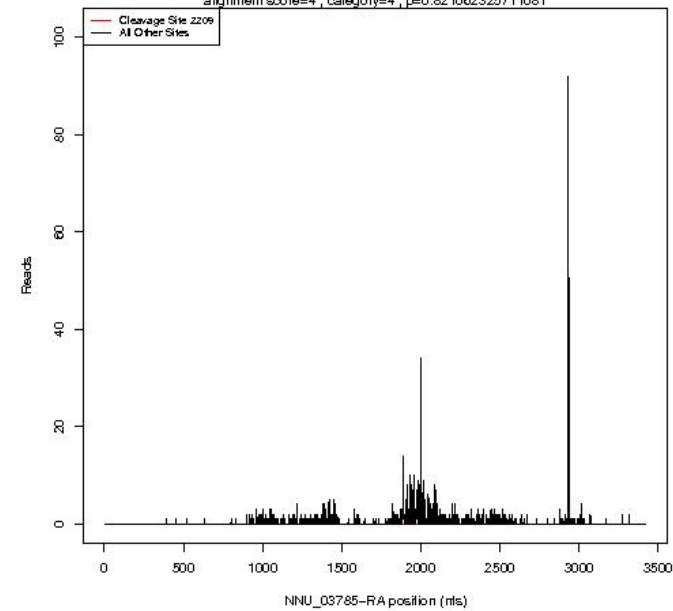

**Nnu-miR394b slicing NNU\_03785-RA at nt 2209**

alignment score=4, category=4, p=0.821062325711081

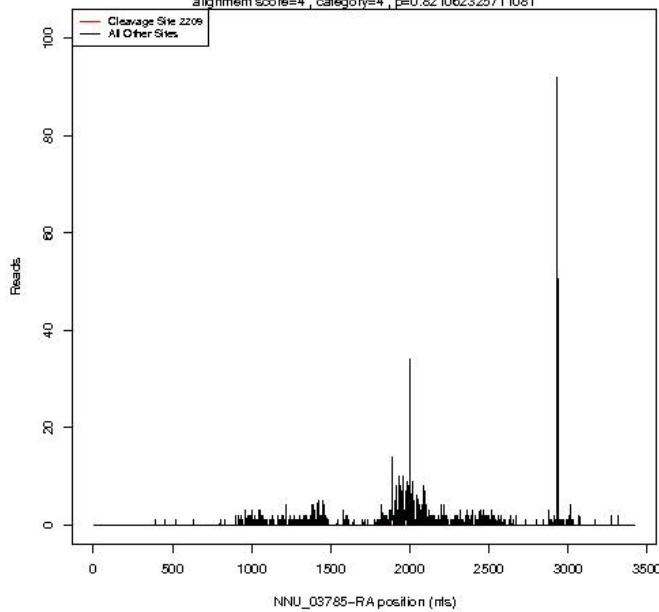

**Nnu-miR396a-5p slicing NNU\_05097-RA at nt 689**

alignment score=3, category=4, p=0.926802723007332

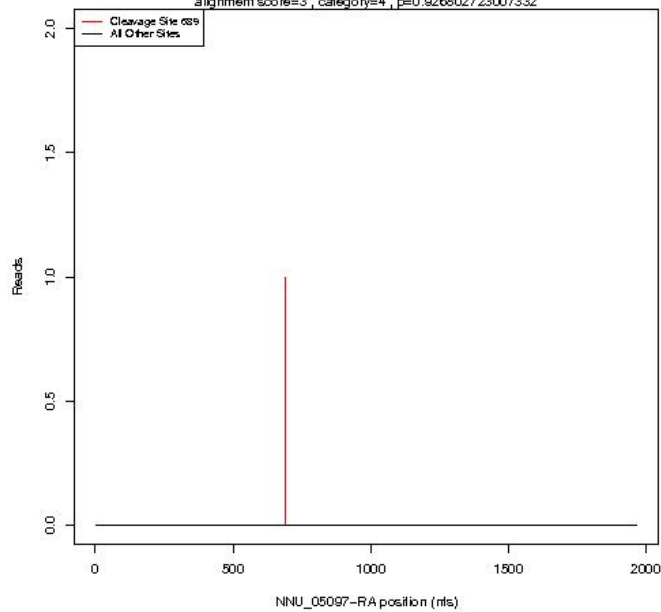

**Nnu-miR396b-5p slicing NNU\_05097-RA at nt 689**

alignment score=4, category=4, p=0.930002169135884

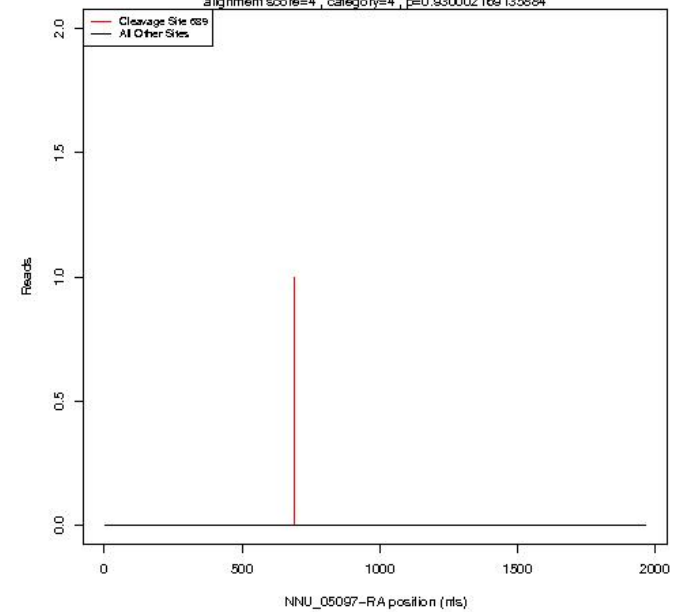

**Nnu-miR396c-5p slicing NNU\_05097-RA at nt 689**

alignment score=3, category=4, p=0.926802723007332

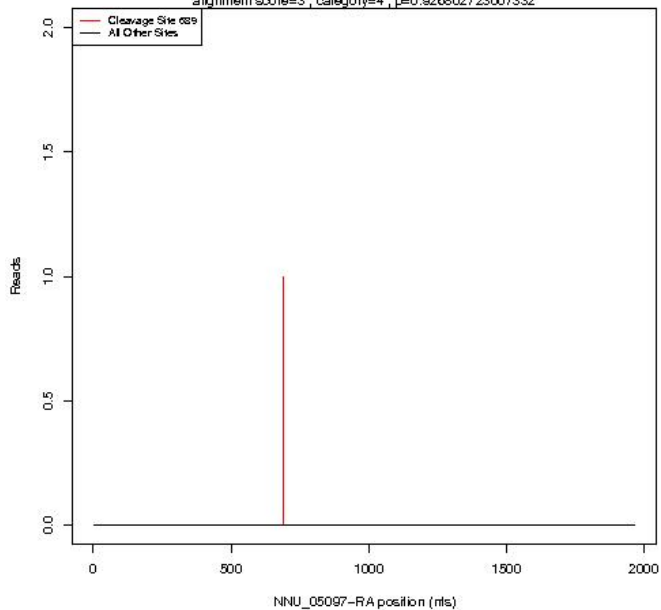

**Nnu-miR396d-5p slicing NNU\_05097-RA at nt 689**

alignment score=3, category=4, p=0.926802723007332

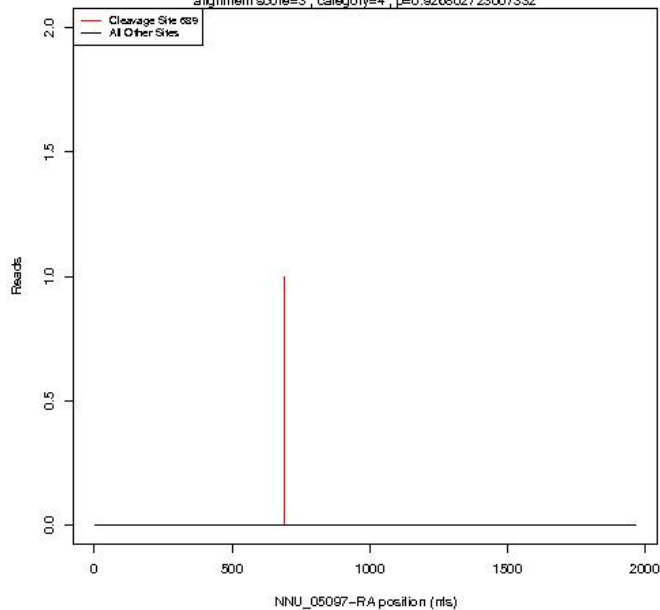

**Nnu-miR396e-5p slicing NNU\_05097-RA at nt 689**

alignment score=4, category=4, p=0.930002169135884

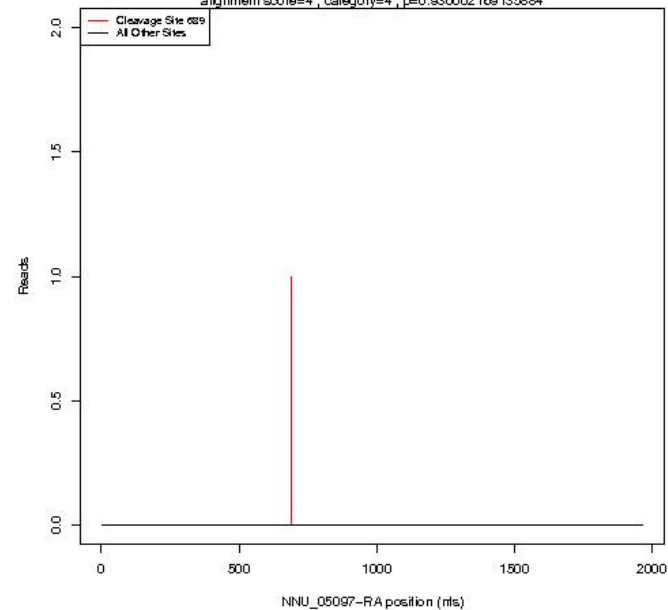

**Nnu-miR396a-5p slicing NNU\_06105-RA at nt 879**

alignment score=3, category=0, p=0.0402286867909494

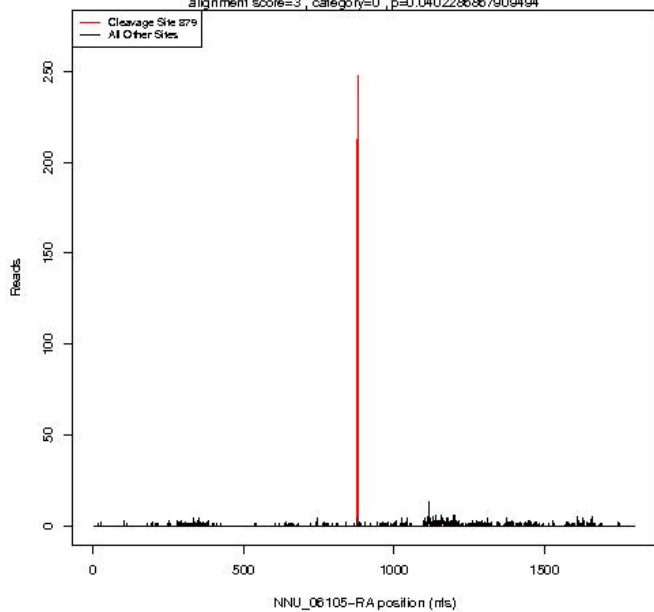

**Nnu-miR396b-5p slicing NNU\_06105-RA at nt 879**

alignment score=4, category=0, p=0.040902098961711

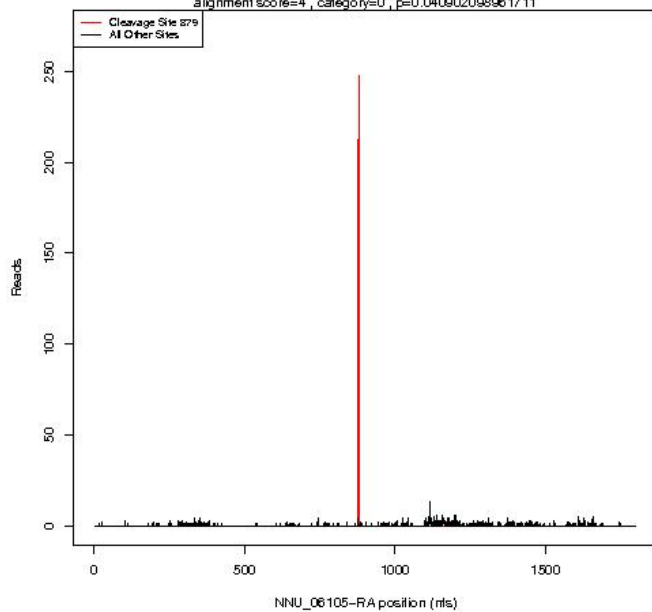

**Nnu-miR396c-5p slicing NNU\_06105-RA at nt 879**

alignment score=3, category=0, p=0.0402286867909494

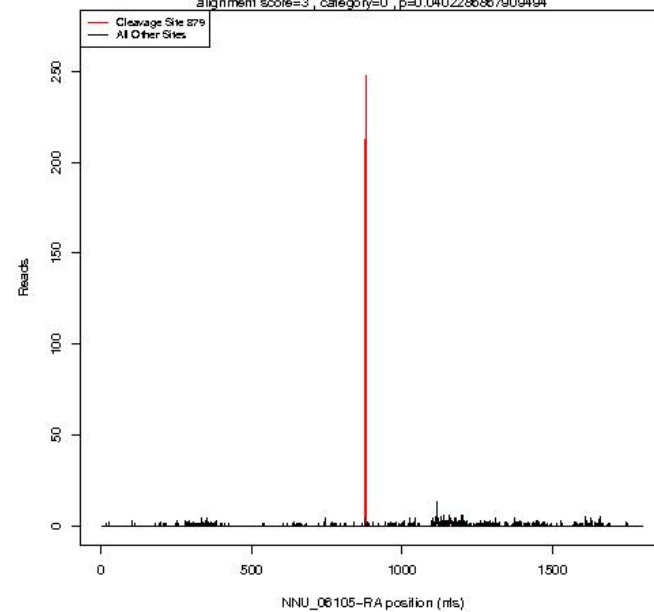

**Nnu-miR396d-5p slicing NNU\_06105-RA at nt 879**

alignment score=3, category=0, p=0.0402286867909494

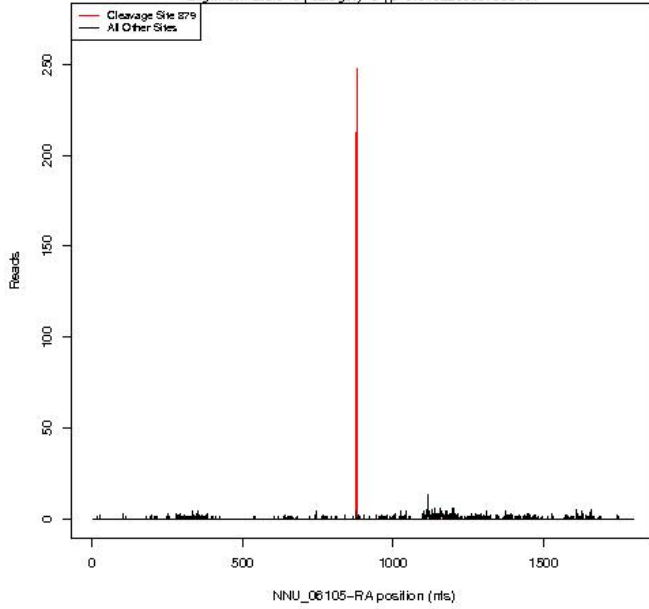

**Nnu-miR396e-5p slicing NNU\_06105-RA at nt 879**

alignment score=4, category=0, p=0.040902098961711

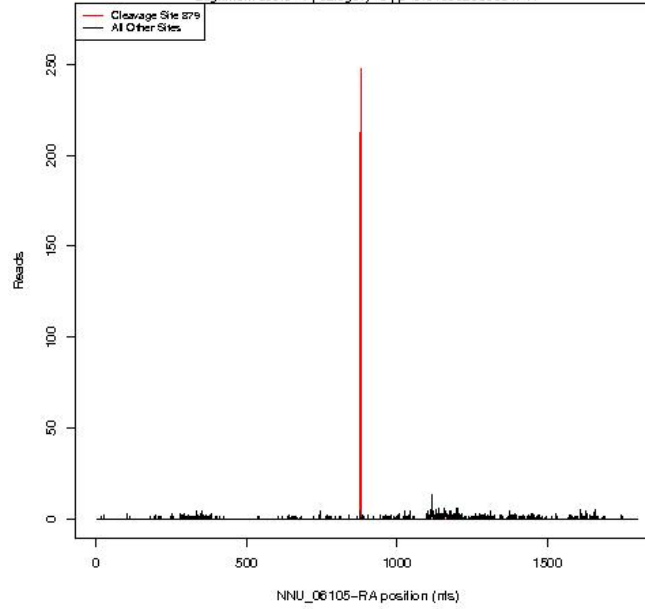

**Nnu-miR396a-5p slicing NNU\_06624-RA at nt 407**

alignment score=4, category=0, p=0.0194609069676492

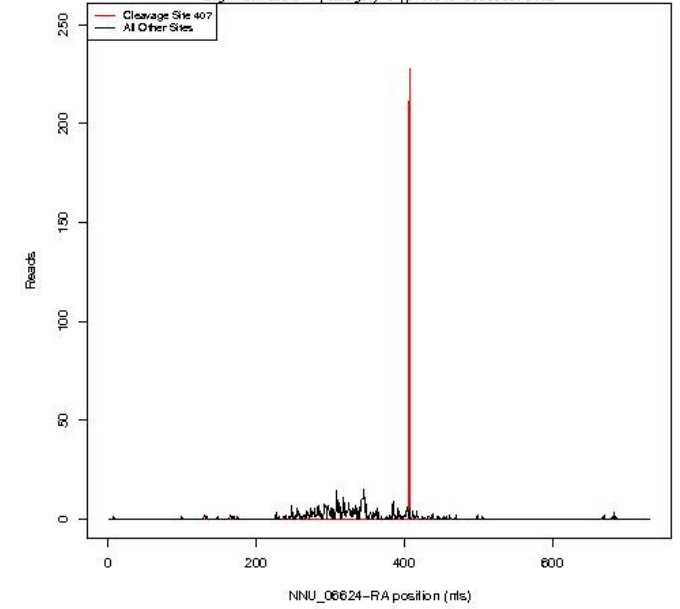

**Nnu-miR396b-5p slicing NNU\_06624-RA at nt 407**

alignment score=3, category=0, p=0.00629704969481137

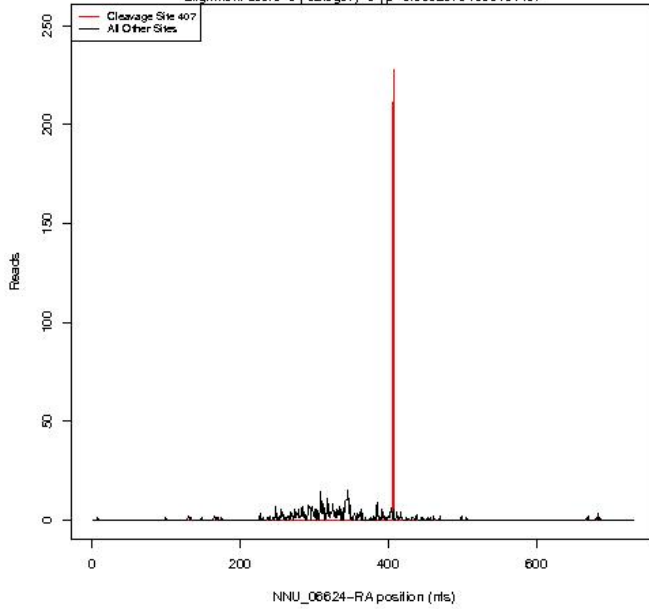

**Nnu-miR396c-5p slicing NNU\_06624-RA at nt 407**

alignment score=4, category=0, p=0.0194609069676492

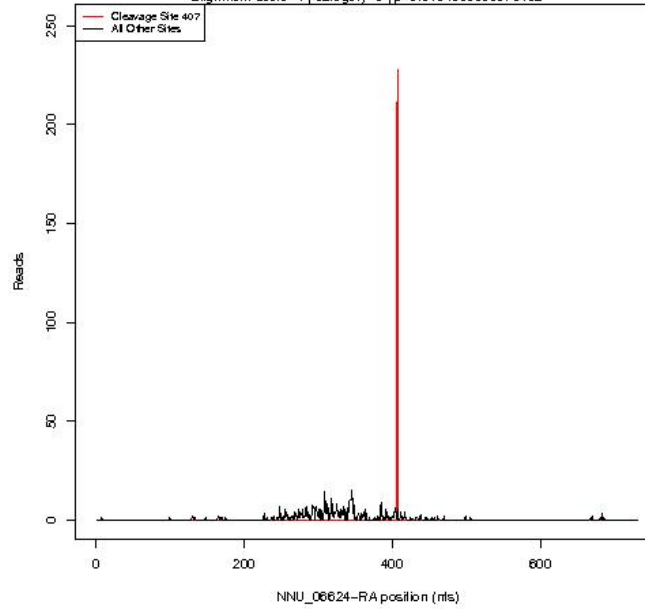

**Nnu-miR396d-5p slicing NNU\_06624-RA at nt 407**

alignment score=4, category=0, p=0.0194609069676492

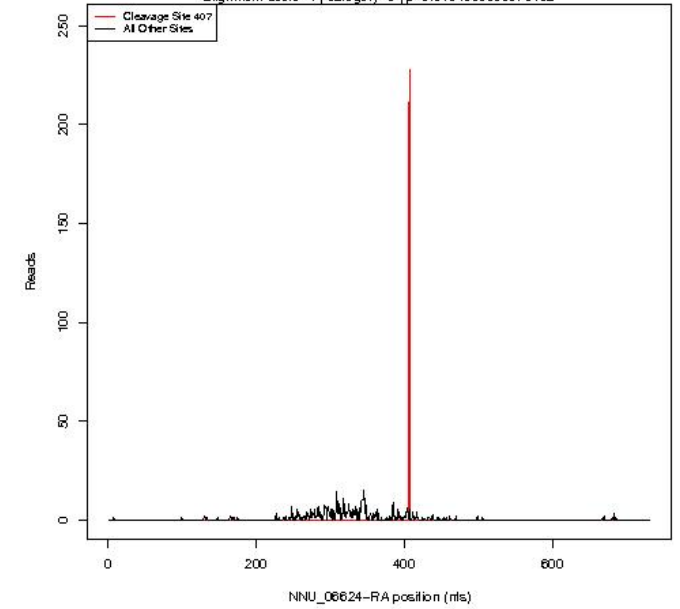

**Nnu-miR396e-5p slicing NNU\_06624-RA at nt 407**

alignment score=3 , category=0 , p=0.00629704969481137

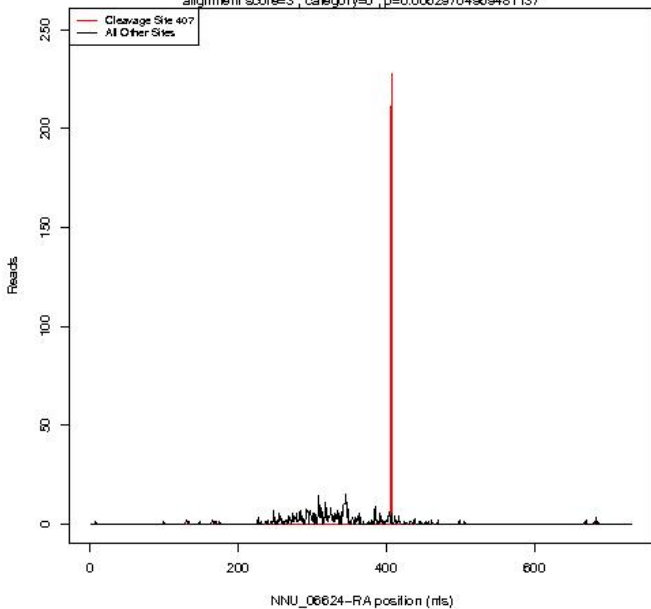

**Nnu-miR396a-5p slicing NNU\_10270-RA at nt 143**

alignment score=3 , category=0 , p=0.040228687909494

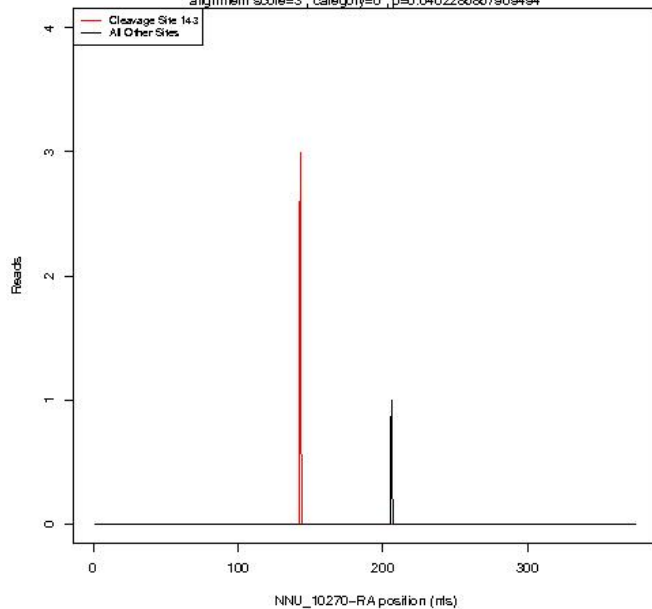

**Nnu-miR396b-5p slicing NNU\_10270-RA at nt 143**

alignment score=4 , category=0 , p=0.04090209961711

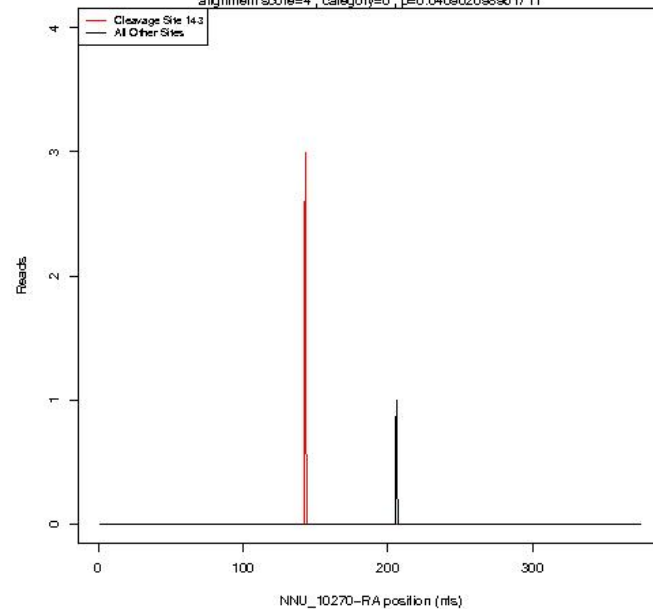

**Nnu-miR396c-5p slicing NNU\_10270-RA at nt 143**

alignment score=3 , category=0 , p=0.040228687909494

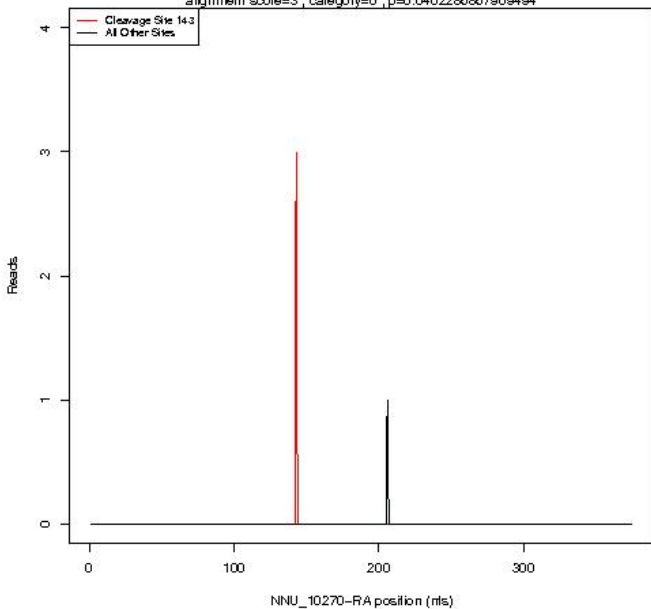

**Nnu-miR396d-5p slicing NNU\_10270-RA at nt 143**

alignment score=3 , category=0 , p=0.040228687909494



**Nnu-miR396e-5p slicing NNU\_10270-RA at nt 143**

alignment score=4 , category=0 , p=0.04090209961711



**Nnu-miR396a-5p slicing NNU\_12135-RA at nt 95**

alignment score=4, category=0, p=0.0194609069676492

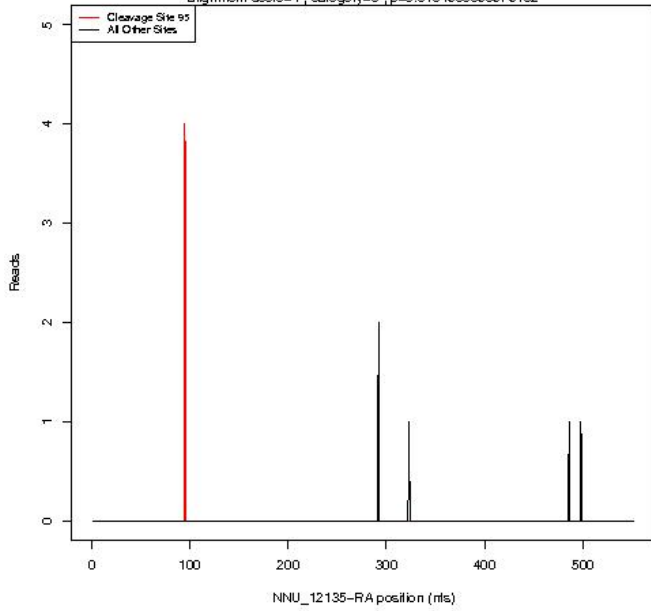

**Nnu-miR396c-5p slicing NNU\_12135-RA at nt 95**

alignment score=4, category=0, p=0.0194609069676492

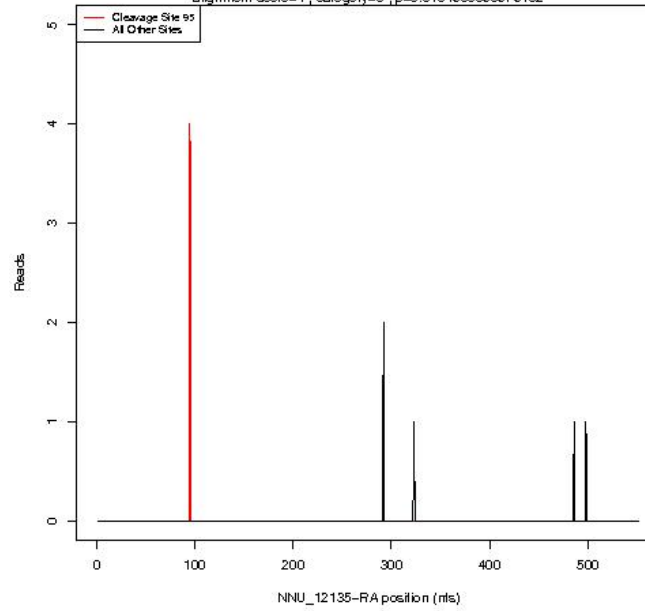

**Nnu-miR396d-5p slicing NNU\_12135-RA at nt 95**

alignment score=4, category=0, p=0.0194609069676492

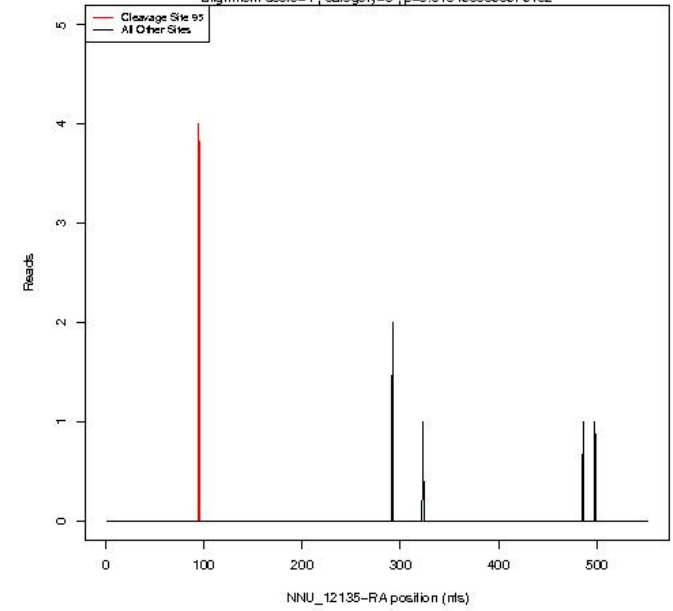

**Nnu-miR396b-5p slicing NNU\_25318-RA at nt 530**

alignment score=4, category=0, p=0.040902098961711

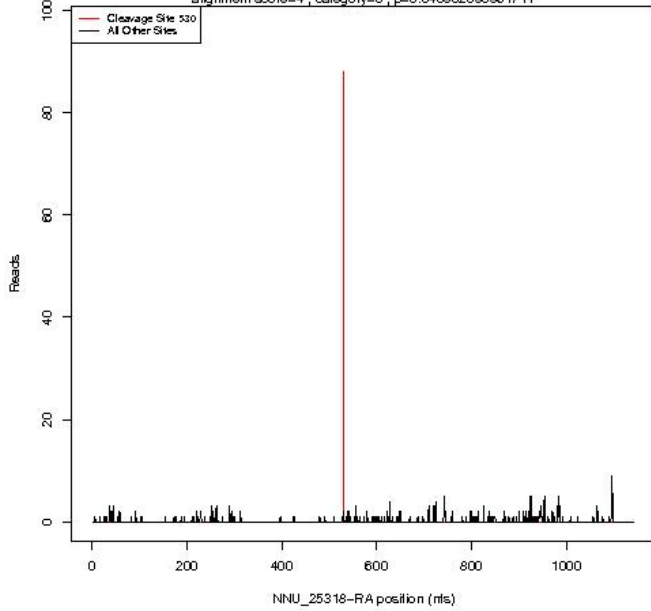

**Nnu-miR396c-5p slicing NNU\_25318-RA at nt 530**

alignment score=3, category=0, p=0.0402286867909494

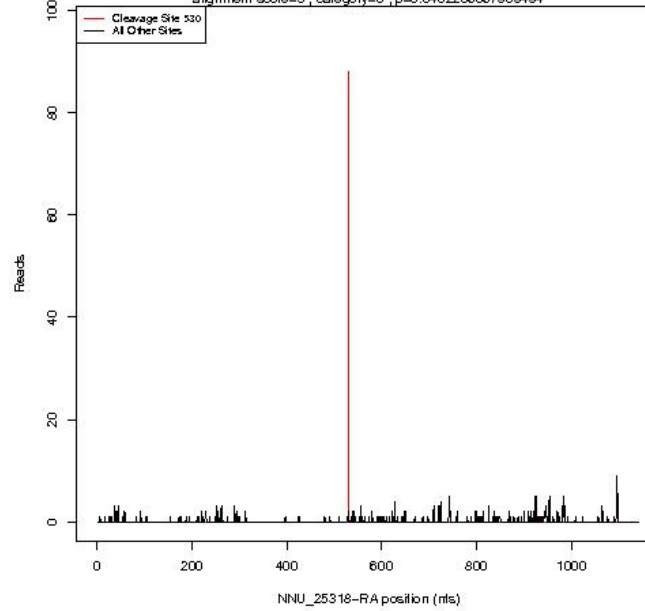

**Nnu-miR396d-5p slicing NNU\_25318-RA at nt 530**

alignment score=3, category=0, p=0.0402286867909494

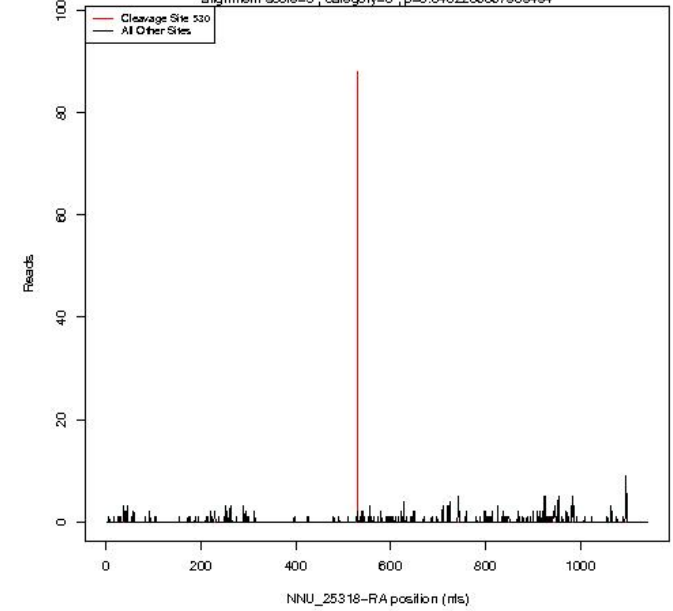

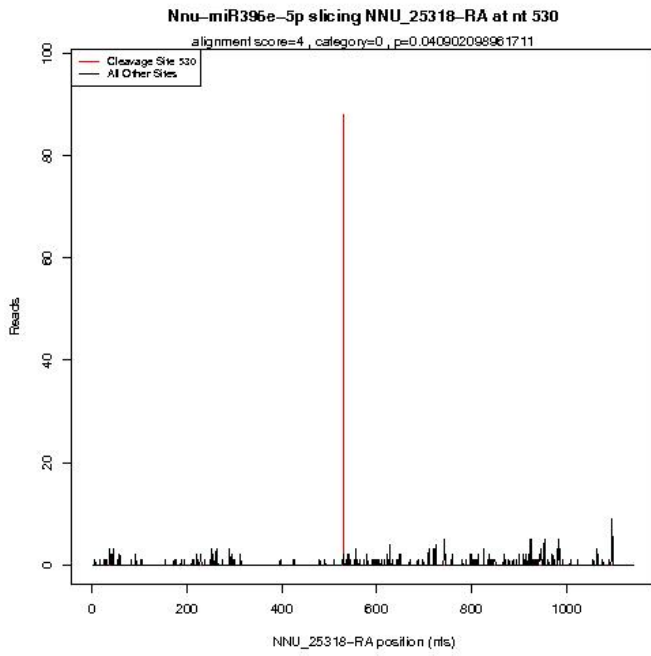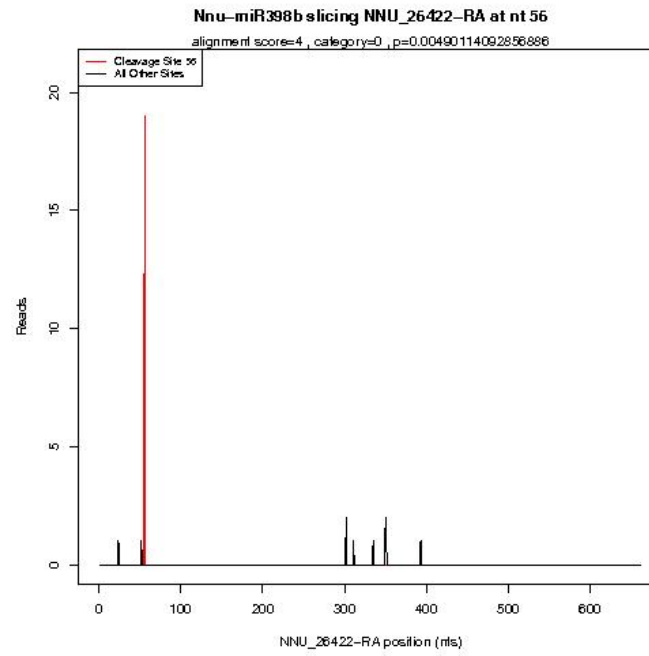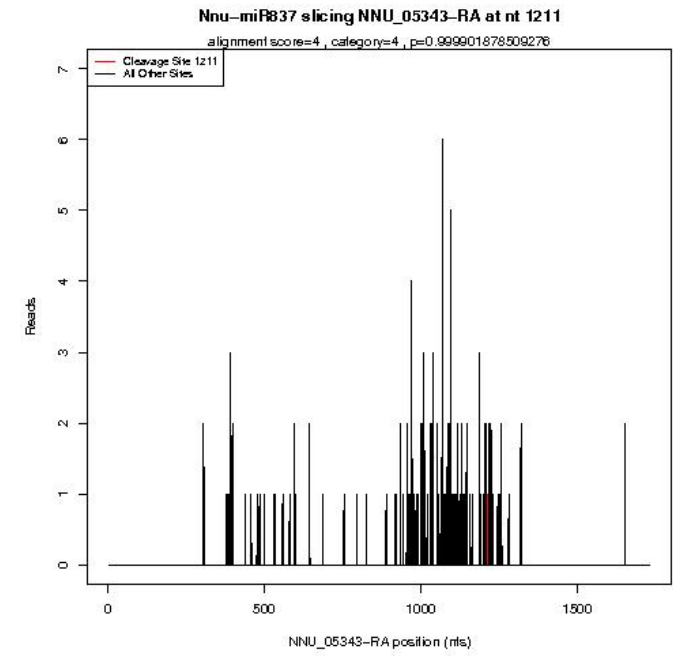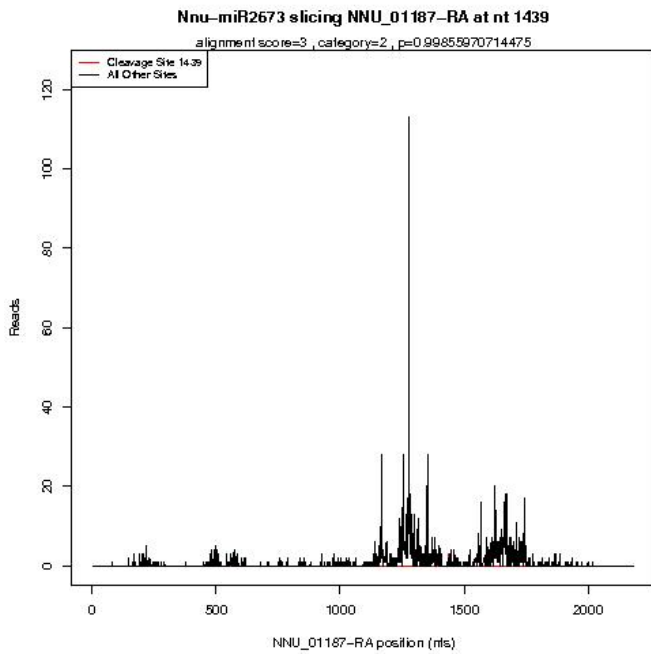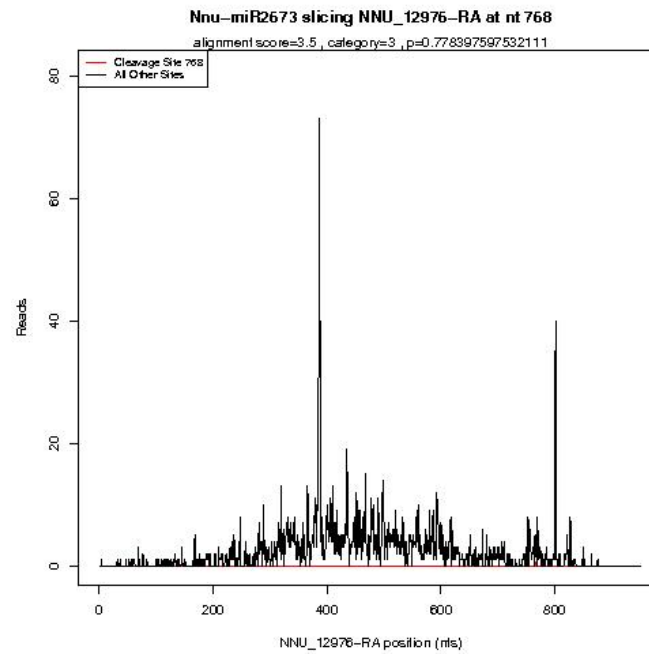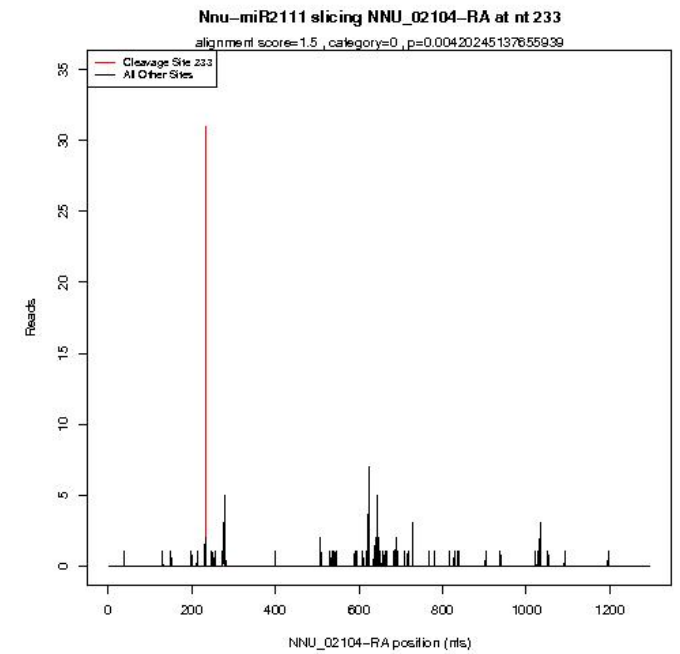

novel\_mir\_27 slicing NNU\_00026-RA at nt 2081

alignment score=2, category=0, p=0.0153228491194648

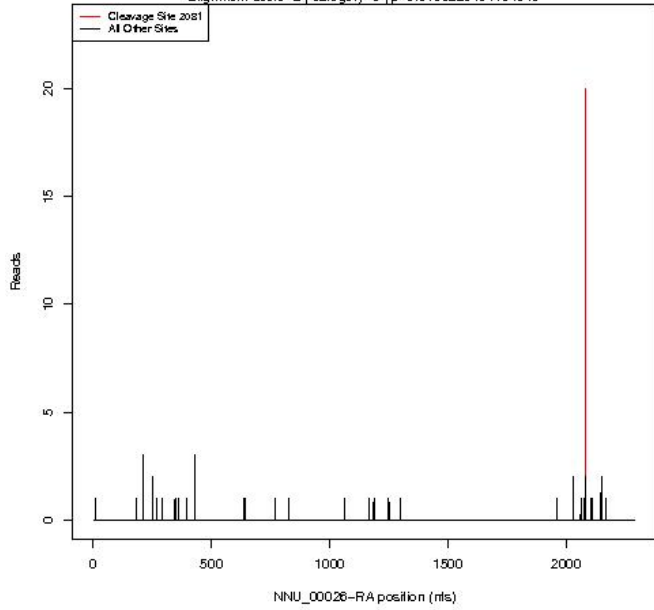

novel\_mir\_27 slicing NNU\_00229-RA at nt 1550

alignment score=3.5, category=0, p=0.005993402533322

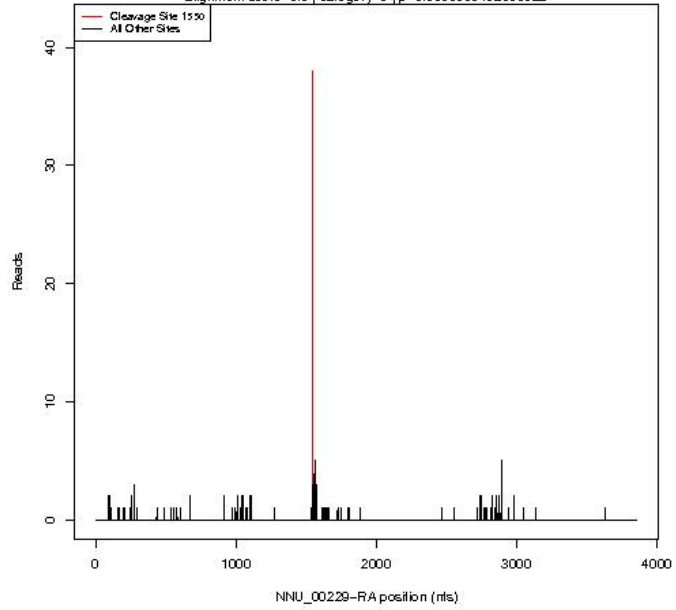

novel\_mir\_36 slicing NNU\_03362-RA at nt 1201

alignment score=3, category=0, p=0.018772440275729

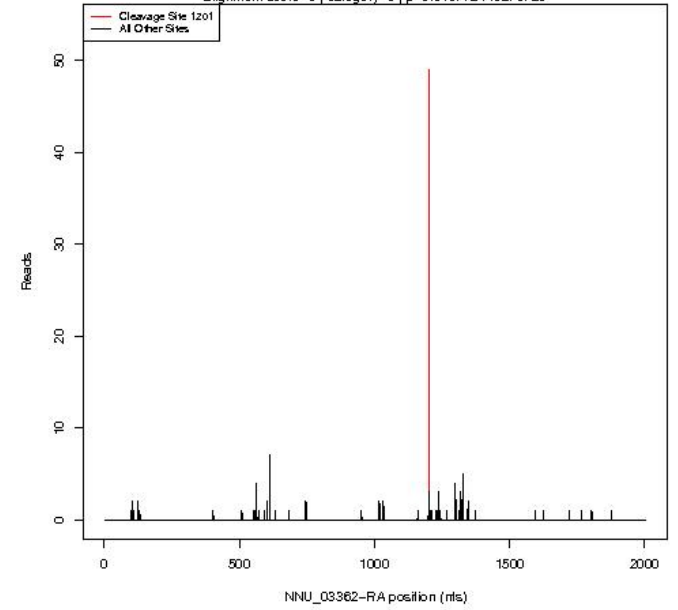

novel\_mir\_92 slicing NNU\_05097-RA at nt 689

alignment score=3, category=4, p=0.987257732799706

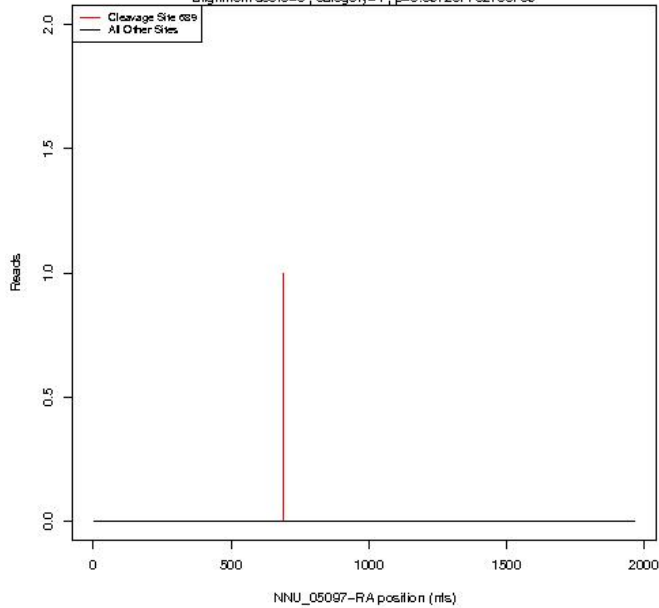

novel\_mir\_27 slicing NNU\_05145-RA at nt 1587

alignment score=2, category=0, p=0.0153228491194648

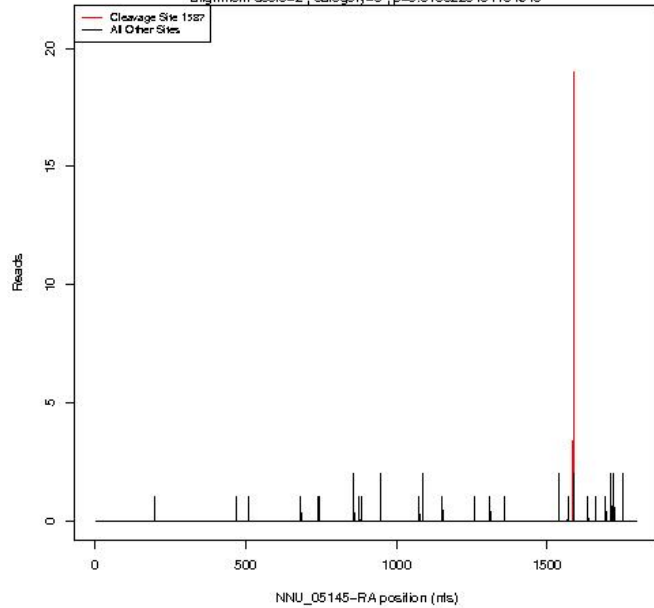

novel\_mir\_29 slicing NNU\_05145-RA at nt 1588

alignment score=2.5, category=2, p=0.483813580604572

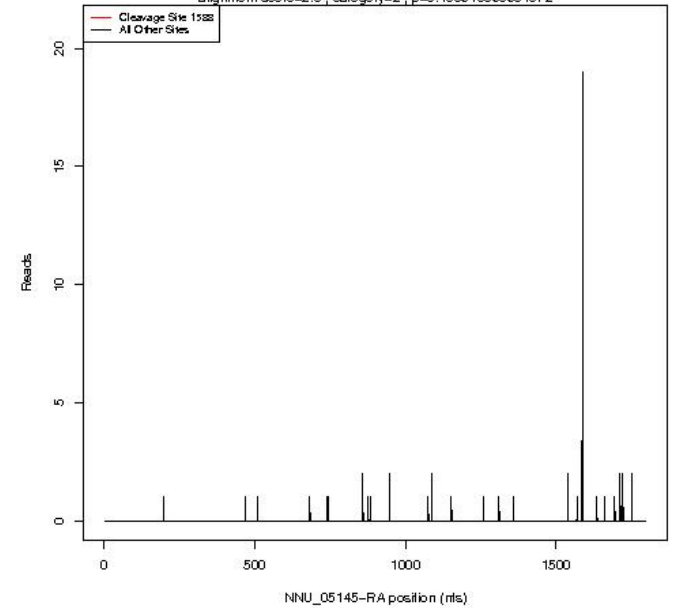



novel\_mir\_46 slicing NNU\_05241-RA at nt 2194

alignment score=3.5 , category=2 , p=0.327356581237984

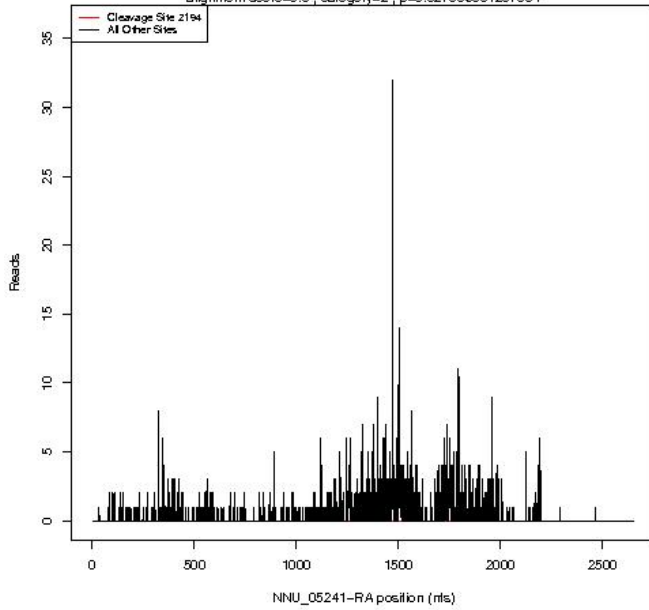

novel\_mir\_92 slicing NNU\_06105-RA at nt 879

alignment score=3 , category=0 , p=0.0522780844474279

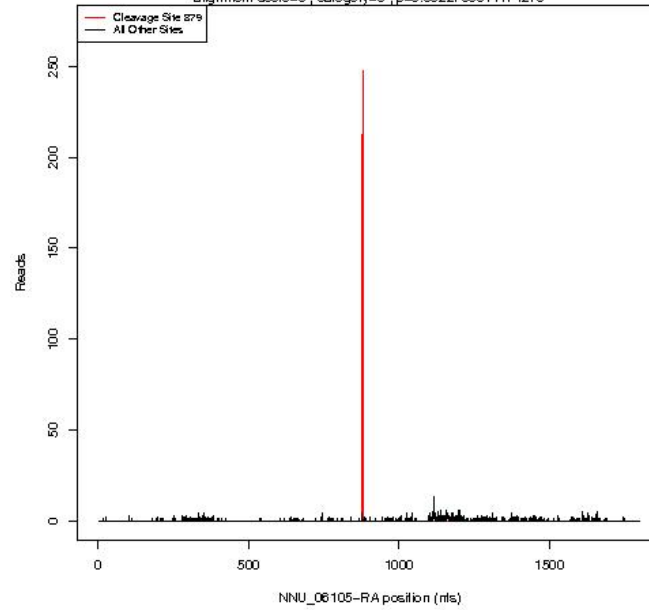

novel\_mir\_92 slicing NNU\_06624-RA at nt 407

alignment score=2.5 , category=0 , p=0.00699426959672722

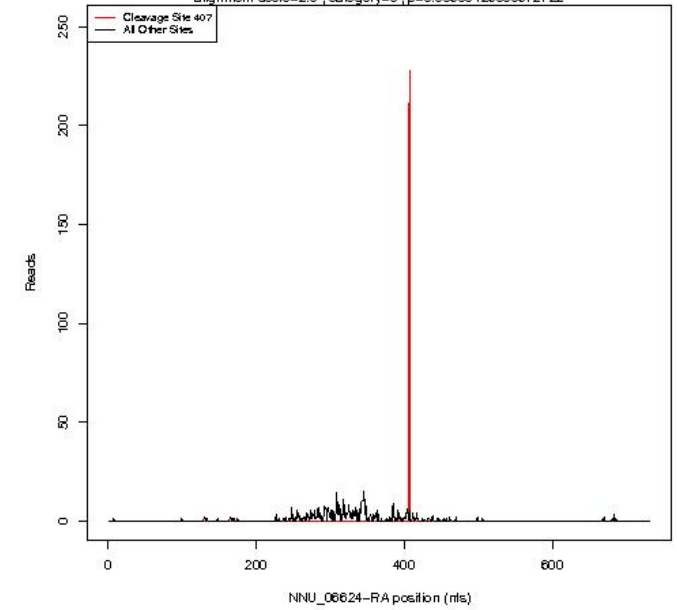

novel\_mir\_48 slicing NNU\_08493-RA at nt 2220

alignment score=4 , category=0 , p=0.0338076421252446

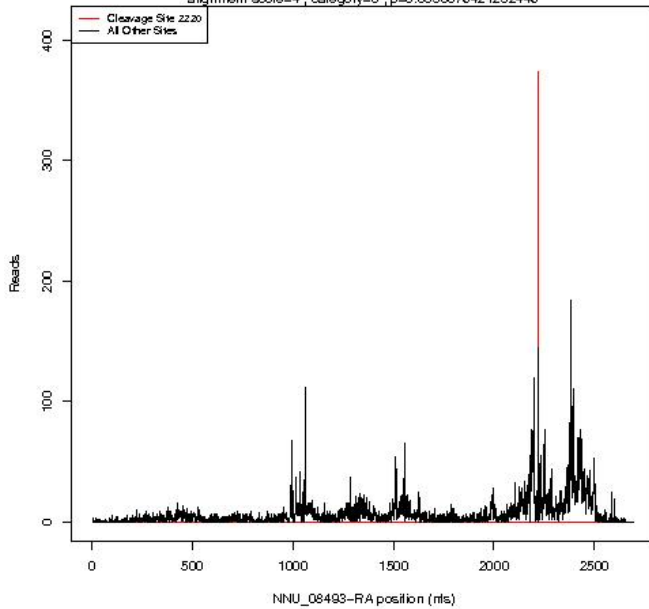

novel\_mir\_36 slicing NNU\_09397-RA at nt 638

alignment score=4 , category=4 , p=0.948806811491155

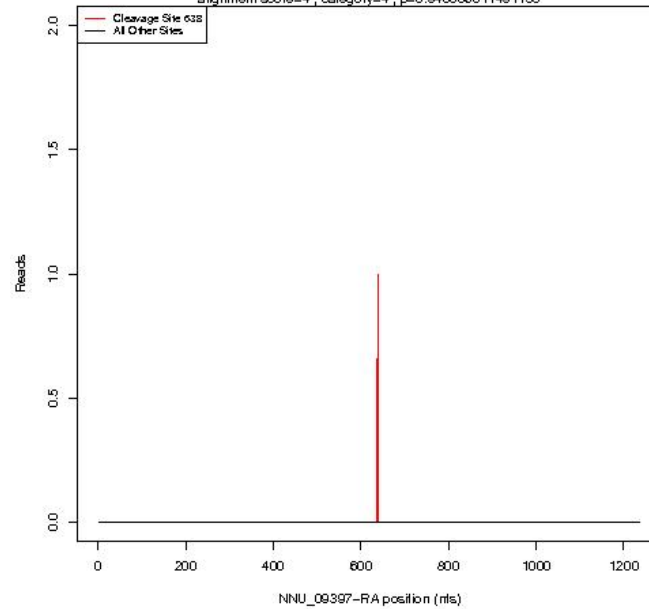

novel\_mir\_36 slicing NNU\_09928-RA at nt 796

alignment score=4 , category=0 , p=0.045602729389943

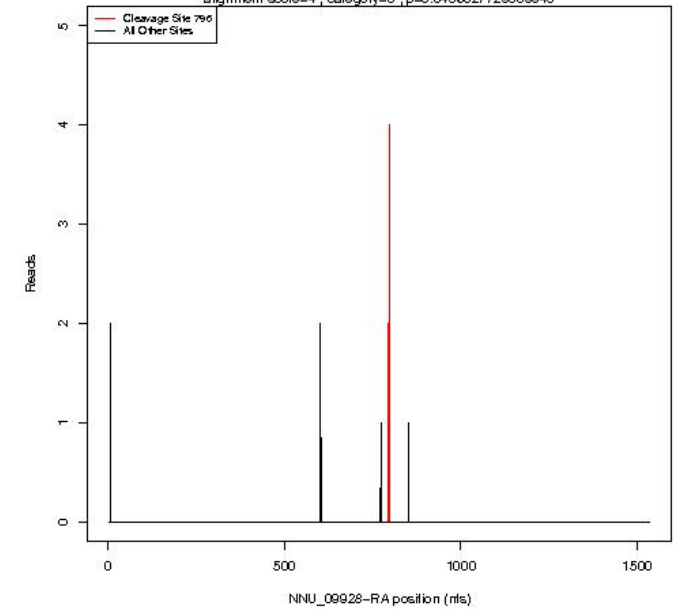

novel\_mir\_92 slicing NNU\_10270-RA at nt 143

alignment score=3, category=0, p=0.0522780844474279

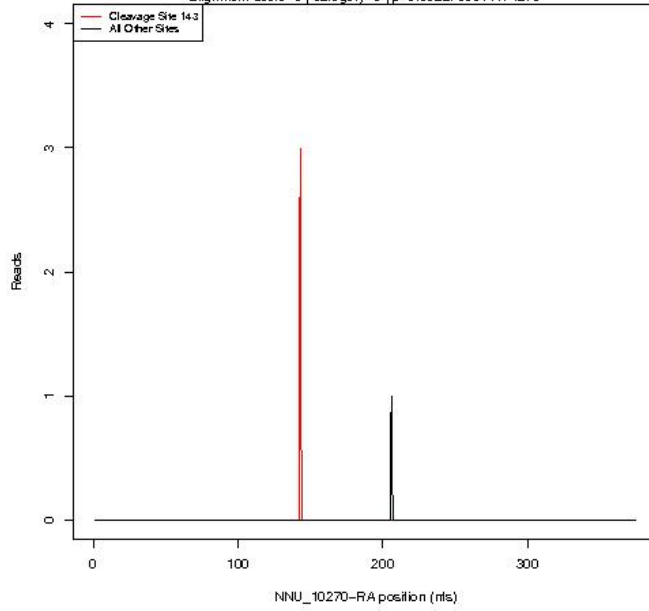

novel\_mir\_29 slicing NNU\_10896-RA at nt 1284

alignment score=2, category=0, p=0.0115142901310157

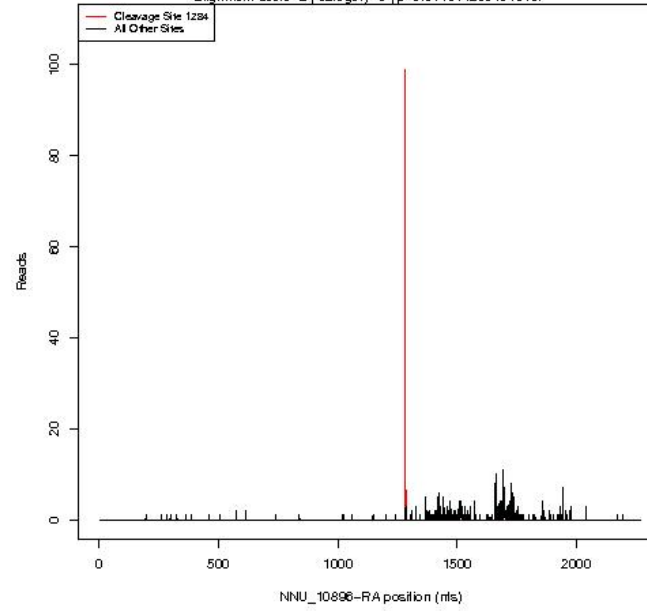

novel\_mir\_36 slicing NNU\_10896-RA at nt 1284

alignment score=3, category=0, p=0.018772440275729

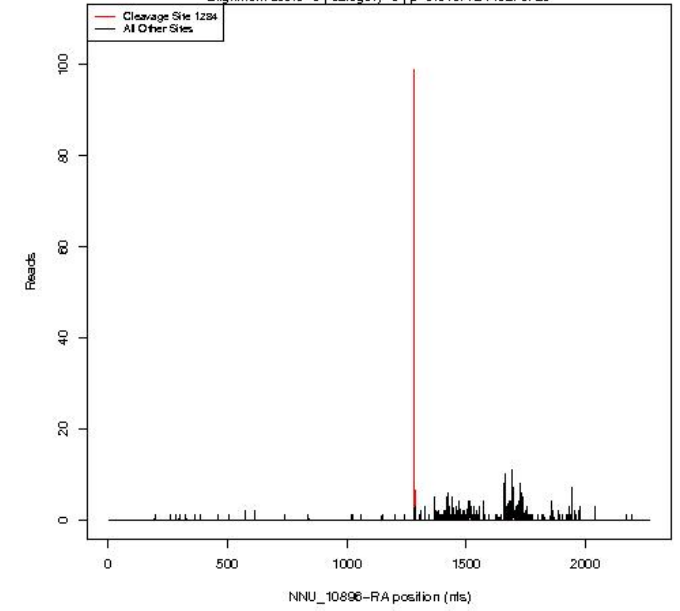

novel\_mir\_92 slicing NNU\_12135-RA at nt 95

alignment score=4, category=0, p=0.0194609069676492

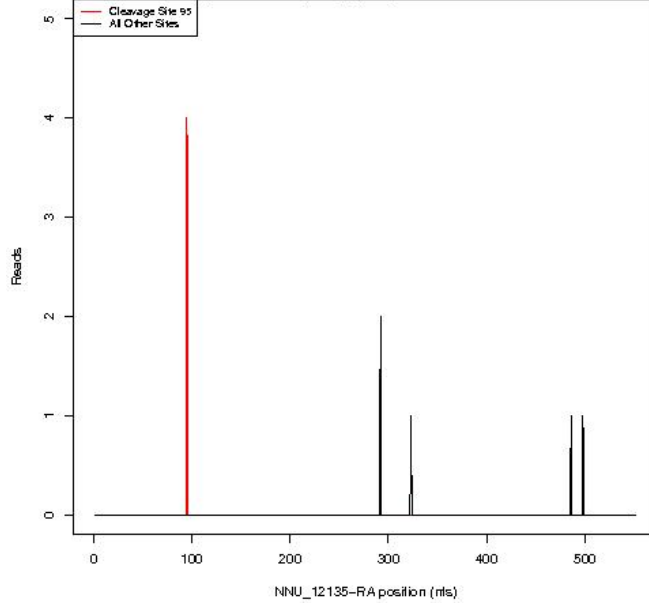

novel\_mir\_1 slicing NNU\_12805-RA at nt 228

alignment score=3.5, category=2, p=0.232302844282898

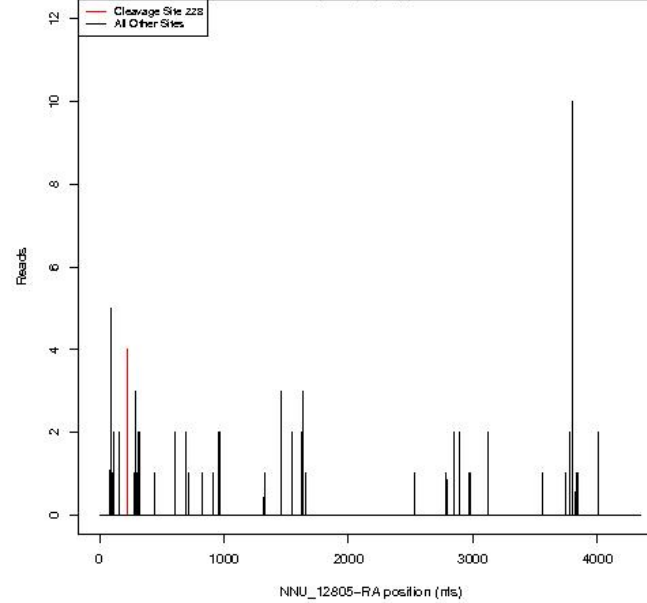

novel\_mir\_92 slicing NNU\_25318-RA at nt 530

alignment score=3, category=0, p=0.0522780844474279

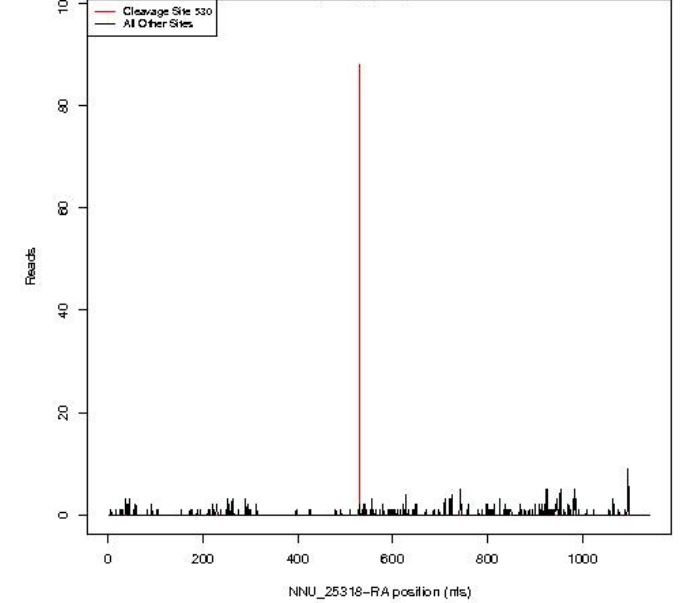

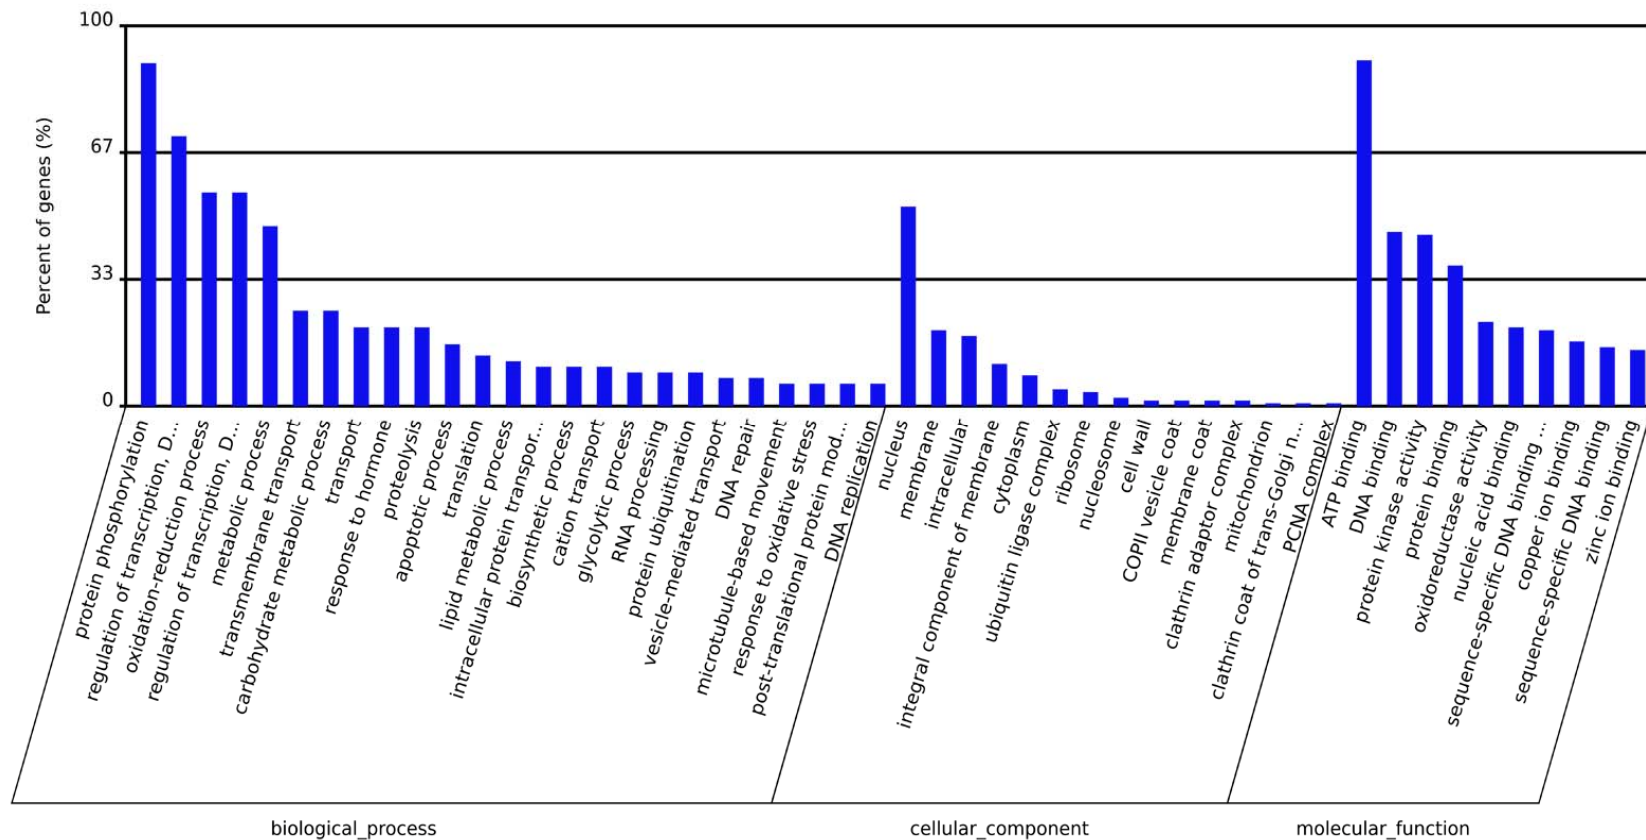

**Additional file 1: Figure S5 GO classification of target transcripts for all identified miRNAs in sacred lotus.**

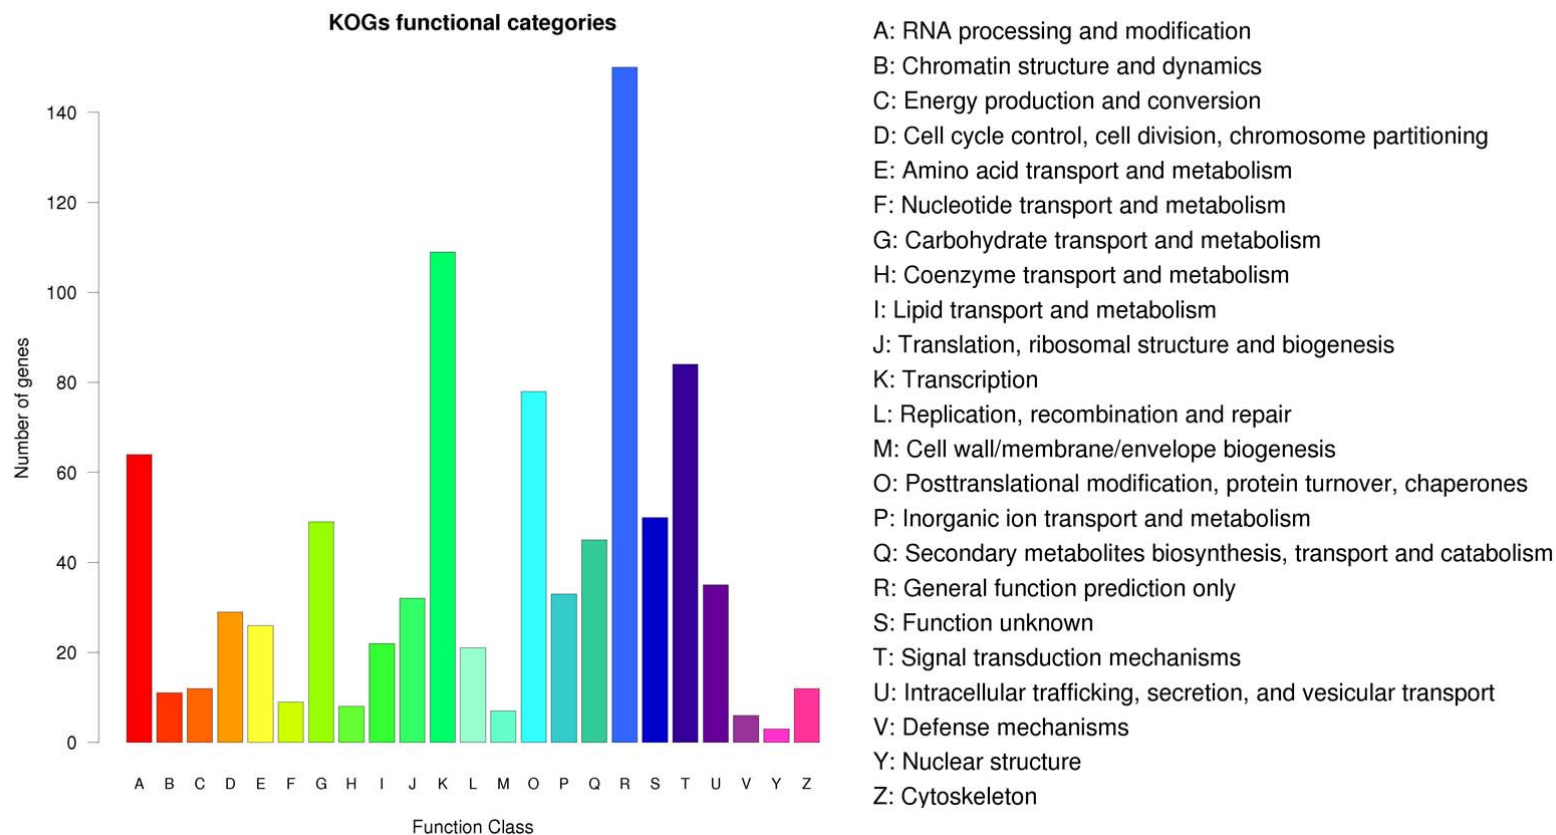

**Additional file 1: Figure S6 KOG function classification of the miRNA targets in sacred lotus.**
